# Supplementary material
Source: HighWire-hosted journal article supplement (https://jnm.snmjournals.org/highwire/filestream/93873/field_highwire_adjunct_files/0/Bolch_appendix_B_final.pdf)
Supplement: Bolch_appendix_B_final.pdf [file Bolch_appendix_B_final.pdf]

**APPENDIX B**  
**Data Tables of  $\alpha$ -Particle Absorbed Fraction to Skeletal Tissues**

**TABLE 1B**  
Absorbed Fractions to TBE and TBV for  $\alpha$ -Emissions Within TBE of Leeds 44-Year Male

| $\phi(\text{TBE} \leftarrow \text{TBE})$ |                       |               |               |                |                     |                  |          |
|------------------------------------------|-----------------------|---------------|---------------|----------------|---------------------|------------------|----------|
| For all cellularities                    |                       |               |               |                |                     |                  |          |
| Energy<br>(MeV)                          | Cervical<br>Vertebrae | Femur<br>Head | Femur<br>Neck | Iliac<br>Crest | Lumbar<br>Vertebrae | Parietal<br>Bone | Ribs     |
| 3.0                                      | 4.76E-01              | 4.75E-01      | 4.75E-01      | 4.75E-01       | 4.75E-01            | 4.75E-01         | 4.75E-01 |
| 3.5                                      | 4.00E-01              | 3.98E-01      | 3.99E-01      | 4.00E-01       | 3.99E-01            | 3.98E-01         | 4.00E-01 |
| 4.0                                      | 3.41E-01              | 3.40E-01      | 3.41E-01      | 3.42E-01       | 3.42E-01            | 3.39E-01         | 3.43E-01 |
| 4.5                                      | 2.97E-01              | 2.95E-01      | 2.97E-01      | 2.98E-01       | 2.97E-01            | 2.94E-01         | 2.99E-01 |
| 5.0                                      | 2.62E-01              | 2.59E-01      | 2.62E-01      | 2.63E-01       | 2.62E-01            | 2.58E-01         | 2.64E-01 |
| 5.5                                      | 2.32E-01              | 2.29E-01      | 2.32E-01      | 2.33E-01       | 2.32E-01            | 2.30E-01         | 2.35E-01 |
| 6.0                                      | 2.08E-01              | 2.04E-01      | 2.08E-01      | 2.09E-01       | 2.08E-01            | 2.07E-01         | 2.11E-01 |
| 6.5                                      | 1.88E-01              | 1.85E-01      | 1.90E-01      | 1.90E-01       | 1.89E-01            | 1.87E-01         | 1.93E-01 |
| 7.0                                      | 1.71E-01              | 1.68E-01      | 1.75E-01      | 1.73E-01       | 1.73E-01            | 1.68E-01         | 1.81E-01 |
| 7.5                                      | 1.57E-01              | 1.54E-01      | 1.62E-01      | 1.59E-01       | 1.60E-01            | 1.53E-01         | 1.68E-01 |
| 8.0                                      | 1.44E-01              | 1.42E-01      | 1.49E-01      | 1.47E-01       | 1.47E-01            | 1.39E-01         | 1.55E-01 |
| 8.5                                      | 1.33E-01              | 1.31E-01      | 1.39E-01      | 1.36E-01       | 1.37E-01            | 1.27E-01         | 1.45E-01 |
| 9.0                                      | 1.24E-01              | 1.22E-01      | 1.30E-01      | 1.27E-01       | 1.29E-01            | 1.16E-01         | 1.37E-01 |
| 9.5                                      | 1.15E-01              | 1.14E-01      | 1.22E-01      | 1.18E-01       | 1.21E-01            | 1.07E-01         | 1.28E-01 |
| 10.0                                     | 1.07E-01              | 1.06E-01      | 1.14E-01      | 1.10E-01       | 1.13E-01            | 9.78E-02         | 1.20E-01 |

  

| $\phi(\text{TBV} \leftarrow \text{TBE})$ |                       |               |               |                |                     |                  |          |
|------------------------------------------|-----------------------|---------------|---------------|----------------|---------------------|------------------|----------|
| For all cellularities                    |                       |               |               |                |                     |                  |          |
| Energy<br>(MeV)                          | Cervical<br>Vertebrae | Femur<br>Head | Femur<br>Neck | Iliac<br>Crest | Lumbar<br>Vertebrae | Parietal<br>Bone | Ribs     |
| 3.0                                      | 2.62E-01              | 2.62E-01      | 2.62E-01      | 2.62E-01       | 2.62E-01            | 2.63E-01         | 2.62E-01 |
| 3.5                                      | 2.99E-01              | 3.01E-01      | 2.99E-01      | 3.00E-01       | 3.00E-01            | 3.01E-01         | 2.99E-01 |
| 4.0                                      | 3.28E-01              | 3.29E-01      | 3.28E-01      | 3.27E-01       | 3.27E-01            | 3.30E-01         | 3.26E-01 |
| 4.5                                      | 3.50E-01              | 3.52E-01      | 3.50E-01      | 3.48E-01       | 3.50E-01            | 3.54E-01         | 3.47E-01 |
| 5.0                                      | 3.66E-01              | 3.70E-01      | 3.66E-01      | 3.65E-01       | 3.66E-01            | 3.72E-01         | 3.63E-01 |
| 5.5                                      | 3.80E-01              | 3.84E-01      | 3.80E-01      | 3.78E-01       | 3.80E-01            | 3.86E-01         | 3.77E-01 |
| 6.0                                      | 3.92E-01              | 3.95E-01      | 3.92E-01      | 3.90E-01       | 3.92E-01            | 3.99E-01         | 3.87E-01 |
| 6.5                                      | 4.00E-01              | 4.05E-01      | 3.99E-01      | 3.98E-01       | 3.99E-01            | 4.10E-01         | 3.94E-01 |
| 7.0                                      | 4.08E-01              | 4.12E-01      | 4.02E-01      | 4.04E-01       | 4.05E-01            | 4.19E-01         | 3.96E-01 |
| 7.5                                      | 4.14E-01              | 4.18E-01      | 4.07E-01      | 4.10E-01       | 4.10E-01            | 4.28E-01         | 3.98E-01 |
| 8.0                                      | 4.20E-01              | 4.23E-01      | 4.10E-01      | 4.13E-01       | 4.14E-01            | 4.34E-01         | 4.01E-01 |
| 8.5                                      | 4.23E-01              | 4.28E-01      | 4.13E-01      | 4.17E-01       | 4.17E-01            | 4.40E-01         | 4.02E-01 |
| 9.0                                      | 4.25E-01              | 4.30E-01      | 4.14E-01      | 4.19E-01       | 4.18E-01            | 4.44E-01         | 4.02E-01 |
| 9.5                                      | 4.28E-01              | 4.33E-01      | 4.16E-01      | 4.21E-01       | 4.19E-01            | 4.48E-01         | 4.02E-01 |
| 10.0                                     | 4.31E-01              | 4.35E-01      | 4.17E-01      | 4.24E-01       | 4.20E-01            | 4.51E-01         | 4.02E-01 |

**TABLE 2B**

Absorbed Fractions to TBE and TBV for  $\alpha$ -Emissions on TBS of Leeds 44-Year Male

| $\phi(\text{TBE} \leftarrow \text{TBS})$ |                    |            |            |             |                  |               |          |
|------------------------------------------|--------------------|------------|------------|-------------|------------------|---------------|----------|
| For all cellularities                    |                    |            |            |             |                  |               |          |
| Energy (MeV)                             | Cervical Vertebrae | Femur Head | Femur Neck | Iliac Crest | Lumbar Vertebrae | Parietal Bone | Ribs     |
| 3.0                                      | 4.42E-01           | 4.41E-01   | 4.43E-01   | 4.42E-01    | 4.42E-01         | 4.40E-01      | 4.44E-01 |
| 3.5                                      | 4.00E-01           | 3.97E-01   | 4.01E-01   | 4.00E-01    | 4.01E-01         | 3.96E-01      | 4.05E-01 |
| 4.0                                      | 3.61E-01           | 3.55E-01   | 3.61E-01   | 3.61E-01    | 3.60E-01         | 3.57E-01      | 3.65E-01 |
| 4.5                                      | 3.25E-01           | 3.18E-01   | 3.24E-01   | 3.24E-01    | 3.24E-01         | 3.24E-01      | 3.30E-01 |
| 5.0                                      | 2.94E-01           | 2.87E-01   | 2.93E-01   | 2.93E-01    | 2.93E-01         | 2.96E-01      | 2.98E-01 |
| 5.5                                      | 2.70E-01           | 2.60E-01   | 2.66E-01   | 2.68E-01    | 2.68E-01         | 2.76E-01      | 2.72E-01 |
| 6.0                                      | 2.52E-01           | 2.40E-01   | 2.48E-01   | 2.47E-01    | 2.49E-01         | 2.63E-01      | 2.56E-01 |
| 6.5                                      | 2.34E-01           | 2.22E-01   | 2.32E-01   | 2.29E-01    | 2.32E-01         | 2.45E-01      | 2.42E-01 |
| 7.0                                      | 2.10E-01           | 2.01E-01   | 2.12E-01   | 2.08E-01    | 2.10E-01         | 2.15E-01      | 2.22E-01 |
| 7.5                                      | 1.89E-01           | 1.83E-01   | 1.94E-01   | 1.90E-01    | 1.92E-01         | 1.92E-01      | 2.03E-01 |
| 8.0                                      | 1.74E-01           | 1.68E-01   | 1.79E-01   | 1.75E-01    | 1.76E-01         | 1.75E-01      | 1.87E-01 |
| 8.5                                      | 1.63E-01           | 1.59E-01   | 1.68E-01   | 1.65E-01    | 1.67E-01         | 1.63E-01      | 1.77E-01 |
| 9.0                                      | 1.52E-01           | 1.48E-01   | 1.58E-01   | 1.54E-01    | 1.57E-01         | 1.50E-01      | 1.66E-01 |
| 9.5                                      | 1.41E-01           | 1.38E-01   | 1.47E-01   | 1.43E-01    | 1.46E-01         | 1.40E-01      | 1.55E-01 |
| 10.0                                     | 1.33E-01           | 1.30E-01   | 1.39E-01   | 1.35E-01    | 1.39E-01         | 1.31E-01      | 1.48E-01 |

  

| $\phi(\text{TBV} \leftarrow \text{TBS})$ |                    |            |            |             |                  |               |          |
|------------------------------------------|--------------------|------------|------------|-------------|------------------|---------------|----------|
| For all cellularities                    |                    |            |            |             |                  |               |          |
| Energy (MeV)                             | Cervical Vertebrae | Femur Head | Femur Neck | Iliac Crest | Lumbar Vertebrae | Parietal Bone | Ribs     |
| 3.0                                      | 4.99E-01           | 4.99E-01   | 4.99E-01   | 4.98E-01    | 4.99E-01         | 5.00E-01      | 4.97E-01 |
| 3.5                                      | 4.95E-01           | 4.98E-01   | 4.95E-01   | 4.94E-01    | 4.95E-01         | 5.01E-01      | 4.92E-01 |
| 4.0                                      | 4.93E-01           | 4.97E-01   | 4.93E-01   | 4.91E-01    | 4.93E-01         | 4.99E-01      | 4.88E-01 |
| 4.5                                      | 4.92E-01           | 4.96E-01   | 4.91E-01   | 4.89E-01    | 4.92E-01         | 4.98E-01      | 4.86E-01 |
| 5.0                                      | 4.92E-01           | 4.96E-01   | 4.90E-01   | 4.88E-01    | 4.90E-01         | 4.99E-01      | 4.86E-01 |
| 5.5                                      | 4.90E-01           | 4.97E-01   | 4.90E-01   | 4.87E-01    | 4.90E-01         | 4.99E-01      | 4.85E-01 |
| 6.0                                      | 4.88E-01           | 4.94E-01   | 4.87E-01   | 4.85E-01    | 4.87E-01         | 4.97E-01      | 4.79E-01 |
| 6.5                                      | 4.89E-01           | 4.94E-01   | 4.83E-01   | 4.83E-01    | 4.85E-01         | 5.01E-01      | 4.75E-01 |
| 7.0                                      | 4.97E-01           | 4.97E-01   | 4.84E-01   | 4.87E-01    | 4.90E-01         | 5.19E-01      | 4.76E-01 |
| 7.5                                      | 5.01E-01           | 5.00E-01   | 4.85E-01   | 4.89E-01    | 4.92E-01         | 5.30E-01      | 4.77E-01 |
| 8.0                                      | 5.05E-01           | 5.00E-01   | 4.86E-01   | 4.90E-01    | 4.94E-01         | 5.37E-01      | 4.77E-01 |
| 8.5                                      | 5.04E-01           | 4.99E-01   | 4.82E-01   | 4.88E-01    | 4.90E-01         | 5.41E-01      | 4.73E-01 |
| 9.0                                      | 5.04E-01           | 4.98E-01   | 4.81E-01   | 4.88E-01    | 4.89E-01         | 5.46E-01      | 4.70E-01 |
| 9.5                                      | 5.05E-01           | 4.98E-01   | 4.79E-01   | 4.85E-01    | 4.88E-01         | 5.48E-01      | 4.69E-01 |
| 10.0                                     | 5.04E-01           | 4.95E-01   | 4.77E-01   | 4.84E-01    | 4.84E-01         | 5.49E-01      | 4.64E-01 |

**TABLE 3B**

Absorbed Fractions to TBE and TBV for  $\alpha$ -Emissions Within TBV of Leeds 44-Year Male

| $\phi(\text{TBE} \leftarrow \text{TBV})$ |                    |            |            |             |                  |               |          |
|------------------------------------------|--------------------|------------|------------|-------------|------------------|---------------|----------|
| For all cellularities                    |                    |            |            |             |                  |               |          |
| Energy (MeV)                             | Cervical Vertebrae | Femur Head | Femur Neck | Iliac Crest | Lumbar Vertebrae | Parietal Bone | Ribs     |
| 3.0                                      | 2.14E-02           | 2.57E-02   | 1.91E-02   | 2.47E-02    | 2.43E-02         | 1.17E-02      | 2.29E-02 |
| 3.5                                      | 2.60E-02           | 3.13E-02   | 2.32E-02   | 2.99E-02    | 2.96E-02         | 1.43E-02      | 2.78E-02 |
| 4.0                                      | 3.03E-02           | 3.68E-02   | 2.69E-02   | 3.49E-02    | 3.42E-02         | 1.65E-02      | 3.20E-02 |
| 4.5                                      | 3.41E-02           | 4.18E-02   | 3.05E-02   | 3.92E-02    | 3.91E-02         | 1.92E-02      | 3.61E-02 |
| 5.0                                      | 3.78E-02           | 4.62E-02   | 3.38E-02   | 4.35E-02    | 4.34E-02         | 2.11E-02      | 4.01E-02 |
| 5.5                                      | 4.15E-02           | 5.06E-02   | 3.71E-02   | 4.75E-02    | 4.74E-02         | 2.32E-02      | 4.38E-02 |
| 6.0                                      | 4.50E-02           | 5.46E-02   | 4.01E-02   | 5.12E-02    | 5.10E-02         | 2.55E-02      | 4.72E-02 |
| 6.5                                      | 4.82E-02           | 5.81E-02   | 4.26E-02   | 5.47E-02    | 5.45E-02         | 2.76E-02      | 5.03E-02 |
| 7.0                                      | 5.15E-02           | 6.19E-02   | 4.48E-02   | 5.77E-02    | 5.78E-02         | 2.93E-02      | 5.32E-02 |
| 7.5                                      | 5.39E-02           | 6.48E-02   | 4.70E-02   | 6.11E-02    | 6.04E-02         | 3.10E-02      | 5.54E-02 |
| 8.0                                      | 5.61E-02           | 6.79E-02   | 4.88E-02   | 6.37E-02    | 6.31E-02         | 3.23E-02      | 5.75E-02 |
| 8.5                                      | 5.81E-02           | 7.05E-02   | 5.06E-02   | 6.57E-02    | 6.53E-02         | 3.35E-02      | 5.97E-02 |
| 9.0                                      | 6.08E-02           | 7.31E-02   | 5.21E-02   | 6.80E-02    | 6.75E-02         | 3.47E-02      | 6.13E-02 |
| 9.5                                      | 6.21E-02           | 7.52E-02   | 5.39E-02   | 6.95E-02    | 6.88E-02         | 3.58E-02      | 6.25E-02 |
| 10.0                                     | 6.37E-02           | 7.74E-02   | 5.50E-02   | 7.17E-02    | 7.10E-02         | 3.67E-02      | 6.41E-02 |

  

| $\phi(\text{TBV} \leftarrow \text{TBV})$ |                    |            |            |             |                  |               |          |
|------------------------------------------|--------------------|------------|------------|-------------|------------------|---------------|----------|
| For all cellularities                    |                    |            |            |             |                  |               |          |
| Energy (MeV)                             | Cervical Vertebrae | Femur Head | Femur Neck | Iliac Crest | Lumbar Vertebrae | Parietal Bone | Ribs     |
| 3.0                                      | 9.78E-01           | 9.73E-01   | 9.80E-01   | 9.74E-01    | 9.75E-01         | 9.88E-01      | 9.76E-01 |
| 3.5                                      | 9.72E-01           | 9.66E-01   | 9.75E-01   | 9.67E-01    | 9.68E-01         | 9.84E-01      | 9.70E-01 |
| 4.0                                      | 9.65E-01           | 9.58E-01   | 9.69E-01   | 9.60E-01    | 9.61E-01         | 9.81E-01      | 9.63E-01 |
| 4.5                                      | 9.58E-01           | 9.49E-01   | 9.63E-01   | 9.52E-01    | 9.52E-01         | 9.77E-01      | 9.56E-01 |
| 5.0                                      | 9.50E-01           | 9.39E-01   | 9.56E-01   | 9.43E-01    | 9.43E-01         | 9.73E-01      | 9.47E-01 |
| 5.5                                      | 9.42E-01           | 9.29E-01   | 9.48E-01   | 9.33E-01    | 9.34E-01         | 9.68E-01      | 9.39E-01 |
| 6.0                                      | 9.33E-01           | 9.18E-01   | 9.40E-01   | 9.23E-01    | 9.24E-01         | 9.63E-01      | 9.29E-01 |
| 6.5                                      | 9.23E-01           | 9.07E-01   | 9.32E-01   | 9.12E-01    | 9.13E-01         | 9.58E-01      | 9.20E-01 |
| 7.0                                      | 9.13E-01           | 8.94E-01   | 9.23E-01   | 9.01E-01    | 9.02E-01         | 9.52E-01      | 9.10E-01 |
| 7.5                                      | 9.04E-01           | 8.82E-01   | 9.15E-01   | 8.89E-01    | 8.91E-01         | 9.47E-01      | 9.00E-01 |
| 8.0                                      | 8.94E-01           | 8.69E-01   | 9.06E-01   | 8.77E-01    | 8.79E-01         | 9.42E-01      | 8.89E-01 |
| 8.5                                      | 8.83E-01           | 8.55E-01   | 8.96E-01   | 8.65E-01    | 8.67E-01         | 9.36E-01      | 8.79E-01 |
| 9.0                                      | 8.72E-01           | 8.42E-01   | 8.87E-01   | 8.52E-01    | 8.55E-01         | 9.31E-01      | 8.68E-01 |
| 9.5                                      | 8.61E-01           | 8.27E-01   | 8.76E-01   | 8.40E-01    | 8.42E-01         | 9.25E-01      | 8.57E-01 |
| 10.0                                     | 8.50E-01           | 8.12E-01   | 8.66E-01   | 8.26E-01    | 8.29E-01         | 9.19E-01      | 8.45E-01 |

**TABLE 4B**

Absorbed Fractions to Active Bone Marrow (TAM) for  $\alpha$ -Emissions within Cervical Vertebrae of Leeds 44-Year Male for Various Source Tissues and Marrow Cellularities

| Cervical Vertebrae                       |             |          |          |          |          |          |          |          |          |          |
|------------------------------------------|-------------|----------|----------|----------|----------|----------|----------|----------|----------|----------|
| $\phi(\text{TAM} \leftarrow \text{TAM})$ |             |          |          |          |          |          |          |          |          |          |
| Energy (MeV)                             | Cellularity |          |          |          |          |          |          |          |          |          |
|                                          | 100%        | 90%      | 80%      | 70%      | 60%      | 50%      | 40%      | 30%      | 20%      | 10%      |
| 3.0                                      | 9.87E-01    | 9.68E-01 | 9.43E-01 | 9.16E-01 | 8.80E-01 | 8.44E-01 | 8.08E-01 | 7.61E-01 | 7.15E-01 | 6.42E-01 |
| 3.5                                      | 9.83E-01    | 9.60E-01 | 9.28E-01 | 8.94E-01 | 8.50E-01 | 8.08E-01 | 7.65E-01 | 7.09E-01 | 6.57E-01 | 5.75E-01 |
| 4.0                                      | 9.80E-01    | 9.51E-01 | 9.12E-01 | 8.72E-01 | 8.20E-01 | 7.70E-01 | 7.21E-01 | 6.59E-01 | 6.00E-01 | 5.12E-01 |
| 4.5                                      | 9.76E-01    | 9.42E-01 | 8.96E-01 | 8.50E-01 | 7.90E-01 | 7.33E-01 | 6.78E-01 | 6.10E-01 | 5.47E-01 | 4.55E-01 |
| 5.0                                      | 9.72E-01    | 9.33E-01 | 8.80E-01 | 8.28E-01 | 7.59E-01 | 6.98E-01 | 6.37E-01 | 5.63E-01 | 4.96E-01 | 4.03E-01 |
| 5.5                                      | 9.67E-01    | 9.23E-01 | 8.64E-01 | 8.05E-01 | 7.32E-01 | 6.65E-01 | 6.00E-01 | 5.21E-01 | 4.52E-01 | 3.56E-01 |
| 6.0                                      | 9.63E-01    | 9.13E-01 | 8.48E-01 | 7.84E-01 | 7.06E-01 | 6.34E-01 | 5.65E-01 | 4.83E-01 | 4.12E-01 | 3.18E-01 |
| 6.5                                      | 9.58E-01    | 9.04E-01 | 8.33E-01 | 7.66E-01 | 6.84E-01 | 6.08E-01 | 5.35E-01 | 4.50E-01 | 3.78E-01 | 2.85E-01 |
| 7.0                                      | 9.54E-01    | 8.95E-01 | 8.20E-01 | 7.49E-01 | 6.66E-01 | 5.86E-01 | 5.11E-01 | 4.23E-01 | 3.49E-01 | 2.57E-01 |
| 7.5                                      | 9.48E-01    | 8.86E-01 | 8.08E-01 | 7.35E-01 | 6.52E-01 | 5.69E-01 | 4.91E-01 | 4.00E-01 | 3.26E-01 | 2.34E-01 |
| 8.0                                      | 9.43E-01    | 8.78E-01 | 7.96E-01 | 7.23E-01 | 6.40E-01 | 5.54E-01 | 4.74E-01 | 3.83E-01 | 3.08E-01 | 2.16E-01 |
| 8.5                                      | 9.38E-01    | 8.70E-01 | 7.88E-01 | 7.14E-01 | 6.31E-01 | 5.44E-01 | 4.62E-01 | 3.69E-01 | 2.92E-01 | 2.01E-01 |
| 9.0                                      | 9.32E-01    | 8.63E-01 | 7.79E-01 | 7.05E-01 | 6.24E-01 | 5.36E-01 | 4.53E-01 | 3.57E-01 | 2.80E-01 | 1.90E-01 |
| 9.5                                      | 9.26E-01    | 8.55E-01 | 7.72E-01 | 6.99E-01 | 6.18E-01 | 5.29E-01 | 4.45E-01 | 3.49E-01 | 2.71E-01 | 1.80E-01 |
| 10.0                                     | 9.20E-01    | 8.49E-01 | 7.66E-01 | 6.94E-01 | 6.13E-01 | 5.22E-01 | 4.37E-01 | 3.40E-01 | 2.63E-01 | 1.71E-01 |
| $\phi(\text{TAM} \leftarrow \text{TBE})$ |             |          |          |          |          |          |          |          |          |          |
| Energy (MeV)                             | Cellularity |          |          |          |          |          |          |          |          |          |
|                                          | 100%        | 90%      | 80%      | 70%      | 60%      | 50%      | 40%      | 30%      | 20%      | 10%      |
| 3.0                                      | 2.62E-01    | 2.37E-01 | 2.11E-01 | 1.87E-01 | 1.63E-01 | 1.35E-01 | 1.09E-01 | 7.78E-02 | 5.38E-02 | 2.69E-02 |
| 3.5                                      | 3.01E-01    | 2.73E-01 | 2.42E-01 | 2.15E-01 | 1.87E-01 | 1.55E-01 | 1.24E-01 | 8.93E-02 | 6.19E-02 | 3.10E-02 |
| 4.0                                      | 3.30E-01    | 2.98E-01 | 2.66E-01 | 2.36E-01 | 2.06E-01 | 1.70E-01 | 1.36E-01 | 9.78E-02 | 6.80E-02 | 3.41E-02 |
| 4.5                                      | 3.52E-01    | 3.20E-01 | 2.84E-01 | 2.53E-01 | 2.20E-01 | 1.82E-01 | 1.46E-01 | 1.05E-01 | 7.25E-02 | 3.64E-02 |
| 5.0                                      | 3.71E-01    | 3.36E-01 | 2.98E-01 | 2.66E-01 | 2.32E-01 | 1.91E-01 | 1.54E-01 | 1.11E-01 | 7.64E-02 | 3.81E-02 |
| 5.5                                      | 3.87E-01    | 3.50E-01 | 3.11E-01 | 2.78E-01 | 2.42E-01 | 1.99E-01 | 1.60E-01 | 1.15E-01 | 7.96E-02 | 3.99E-02 |
| 6.0                                      | 3.99E-01    | 3.62E-01 | 3.22E-01 | 2.86E-01 | 2.50E-01 | 2.06E-01 | 1.65E-01 | 1.19E-01 | 8.20E-02 | 4.11E-02 |
| 6.5                                      | 4.12E-01    | 3.71E-01 | 3.30E-01 | 2.95E-01 | 2.57E-01 | 2.12E-01 | 1.70E-01 | 1.22E-01 | 8.45E-02 | 4.23E-02 |
| 7.0                                      | 4.20E-01    | 3.81E-01 | 3.38E-01 | 3.00E-01 | 2.63E-01 | 2.17E-01 | 1.73E-01 | 1.25E-01 | 8.62E-02 | 4.33E-02 |
| 7.5                                      | 4.29E-01    | 3.88E-01 | 3.45E-01 | 3.07E-01 | 2.68E-01 | 2.21E-01 | 1.77E-01 | 1.28E-01 | 8.87E-02 | 4.42E-02 |
| 8.0                                      | 4.36E-01    | 3.96E-01 | 3.51E-01 | 3.13E-01 | 2.73E-01 | 2.24E-01 | 1.81E-01 | 1.30E-01 | 8.98E-02 | 4.49E-02 |
| 8.5                                      | 4.43E-01    | 4.02E-01 | 3.57E-01 | 3.18E-01 | 2.77E-01 | 2.28E-01 | 1.83E-01 | 1.32E-01 | 9.09E-02 | 4.54E-02 |
| 9.0                                      | 4.50E-01    | 4.08E-01 | 3.62E-01 | 3.22E-01 | 2.81E-01 | 2.31E-01 | 1.86E-01 | 1.33E-01 | 9.23E-02 | 4.63E-02 |
| 9.5                                      | 4.56E-01    | 4.13E-01 | 3.67E-01 | 3.27E-01 | 2.84E-01 | 2.35E-01 | 1.88E-01 | 1.35E-01 | 9.35E-02 | 4.67E-02 |
| 10.0                                     | 4.62E-01    | 4.18E-01 | 3.71E-01 | 3.31E-01 | 2.89E-01 | 2.37E-01 | 1.90E-01 | 1.37E-01 | 9.46E-02 | 4.72E-02 |

TABLE 4B (Continued)

| Cervical Vertebrae                       |             |          |          |          |          |          |          |          |          |          |
|------------------------------------------|-------------|----------|----------|----------|----------|----------|----------|----------|----------|----------|
| $\phi(\text{TAM} \leftarrow \text{TBS})$ |             |          |          |          |          |          |          |          |          |          |
| Energy<br>(MeV)                          | Cellularity |          |          |          |          |          |          |          |          |          |
|                                          | 100%        | 90%      | 80%      | 70%      | 60%      | 50%      | 40%      | 30%      | 20%      | 10%      |
| 3.0                                      | 5.91E-02    | 5.37E-02 | 4.77E-02 | 4.25E-02 | 3.72E-02 | 3.07E-02 | 2.46E-02 | 1.77E-02 | 1.23E-02 | 6.05E-03 |
| 3.5                                      | 1.05E-01    | 9.45E-02 | 8.39E-02 | 7.48E-02 | 6.47E-02 | 5.39E-02 | 4.32E-02 | 3.10E-02 | 2.13E-02 | 1.08E-02 |
| 4.0                                      | 1.46E-01    | 1.33E-01 | 1.18E-01 | 1.05E-01 | 9.14E-02 | 7.53E-02 | 6.03E-02 | 4.32E-02 | 3.01E-02 | 1.49E-02 |
| 4.5                                      | 1.83E-01    | 1.65E-01 | 1.48E-01 | 1.32E-01 | 1.14E-01 | 9.43E-02 | 7.55E-02 | 5.43E-02 | 3.77E-02 | 1.91E-02 |
| 5.0                                      | 2.14E-01    | 1.94E-01 | 1.72E-01 | 1.54E-01 | 1.34E-01 | 1.11E-01 | 8.87E-02 | 6.38E-02 | 4.45E-02 | 2.21E-02 |
| 5.5                                      | 2.39E-01    | 2.17E-01 | 1.93E-01 | 1.72E-01 | 1.50E-01 | 1.24E-01 | 9.94E-02 | 7.17E-02 | 4.95E-02 | 2.47E-02 |
| 6.0                                      | 2.59E-01    | 2.35E-01 | 2.09E-01 | 1.86E-01 | 1.63E-01 | 1.35E-01 | 1.08E-01 | 7.81E-02 | 5.39E-02 | 2.69E-02 |
| 6.5                                      | 2.77E-01    | 2.52E-01 | 2.24E-01 | 1.99E-01 | 1.74E-01 | 1.44E-01 | 1.15E-01 | 8.35E-02 | 5.78E-02 | 2.90E-02 |
| 7.0                                      | 2.93E-01    | 2.67E-01 | 2.38E-01 | 2.12E-01 | 1.85E-01 | 1.53E-01 | 1.23E-01 | 8.86E-02 | 6.09E-02 | 3.07E-02 |
| 7.5                                      | 3.09E-01    | 2.81E-01 | 2.49E-01 | 2.22E-01 | 1.94E-01 | 1.60E-01 | 1.28E-01 | 9.26E-02 | 6.41E-02 | 3.21E-02 |
| 8.0                                      | 3.20E-01    | 2.92E-01 | 2.60E-01 | 2.32E-01 | 2.02E-01 | 1.67E-01 | 1.34E-01 | 9.67E-02 | 6.67E-02 | 3.33E-02 |
| 8.5                                      | 3.32E-01    | 3.02E-01 | 2.68E-01 | 2.40E-01 | 2.10E-01 | 1.73E-01 | 1.39E-01 | 1.00E-01 | 6.90E-02 | 3.46E-02 |
| 9.0                                      | 3.44E-01    | 3.11E-01 | 2.78E-01 | 2.48E-01 | 2.17E-01 | 1.78E-01 | 1.43E-01 | 1.03E-01 | 7.11E-02 | 3.55E-02 |
| 9.5                                      | 3.54E-01    | 3.21E-01 | 2.85E-01 | 2.54E-01 | 2.22E-01 | 1.83E-01 | 1.48E-01 | 1.06E-01 | 7.29E-02 | 3.70E-02 |
| 10.0                                     | 3.63E-01    | 3.30E-01 | 2.92E-01 | 2.62E-01 | 2.28E-01 | 1.88E-01 | 1.51E-01 | 1.08E-01 | 7.52E-02 | 3.76E-02 |
| $\phi(\text{TAM} \leftarrow \text{TBV})$ |             |          |          |          |          |          |          |          |          |          |
| Energy<br>(MeV)                          | Cellularity |          |          |          |          |          |          |          |          |          |
|                                          | 100%        | 90%      | 80%      | 70%      | 60%      | 50%      | 40%      | 30%      | 20%      | 10%      |
| 3.0                                      | 8.80E-04    | 7.96E-04 | 7.22E-04 | 6.12E-04 | 5.28E-04 | 4.49E-04 | 3.61E-04 | 2.52E-04 | 1.88E-04 | 9.00E-05 |
| 3.5                                      | 2.28E-03    | 2.05E-03 | 1.79E-03 | 1.65E-03 | 1.43E-03 | 1.20E-03 | 9.40E-04 | 6.89E-04 | 5.06E-04 | 2.30E-04 |
| 4.0                                      | 4.54E-03    | 4.12E-03 | 3.70E-03 | 3.29E-03 | 2.86E-03 | 2.34E-03 | 1.91E-03 | 1.38E-03 | 9.12E-04 | 4.59E-04 |
| 4.5                                      | 7.77E-03    | 7.14E-03 | 6.36E-03 | 5.67E-03 | 4.80E-03 | 4.02E-03 | 3.24E-03 | 2.28E-03 | 1.61E-03 | 8.11E-04 |
| 5.0                                      | 1.19E-02    | 1.06E-02 | 9.53E-03 | 8.51E-03 | 7.37E-03 | 6.11E-03 | 4.93E-03 | 3.49E-03 | 2.38E-03 | 1.20E-03 |
| 5.5                                      | 1.66E-02    | 1.50E-02 | 1.35E-02 | 1.20E-02 | 1.04E-02 | 8.60E-03 | 6.89E-03 | 5.03E-03 | 3.42E-03 | 1.70E-03 |
| 6.0                                      | 2.20E-02    | 1.99E-02 | 1.78E-02 | 1.59E-02 | 1.38E-02 | 1.13E-02 | 9.22E-03 | 6.64E-03 | 4.58E-03 | 2.25E-03 |
| 6.5                                      | 2.84E-02    | 2.55E-02 | 2.28E-02 | 2.03E-02 | 1.77E-02 | 1.45E-02 | 1.18E-02 | 8.44E-03 | 5.76E-03 | 2.91E-03 |
| 7.0                                      | 3.52E-02    | 3.14E-02 | 2.82E-02 | 2.50E-02 | 2.19E-02 | 1.81E-02 | 1.45E-02 | 1.04E-02 | 7.28E-03 | 3.63E-03 |
| 7.5                                      | 4.24E-02    | 3.83E-02 | 3.43E-02 | 3.04E-02 | 2.64E-02 | 2.20E-02 | 1.76E-02 | 1.27E-02 | 8.75E-03 | 4.44E-03 |
| 8.0                                      | 5.01E-02    | 4.55E-02 | 4.02E-02 | 3.59E-02 | 3.15E-02 | 2.60E-02 | 2.09E-02 | 1.50E-02 | 1.05E-02 | 5.20E-03 |
| 8.5                                      | 5.87E-02    | 5.33E-02 | 4.73E-02 | 4.21E-02 | 3.69E-02 | 3.04E-02 | 2.43E-02 | 1.77E-02 | 1.22E-02 | 6.11E-03 |
| 9.0                                      | 6.76E-02    | 6.14E-02 | 5.45E-02 | 4.84E-02 | 4.25E-02 | 3.50E-02 | 2.83E-02 | 2.04E-02 | 1.40E-02 | 6.96E-03 |
| 9.5                                      | 7.70E-02    | 7.00E-02 | 6.21E-02 | 5.54E-02 | 4.85E-02 | 4.01E-02 | 3.23E-02 | 2.30E-02 | 1.60E-02 | 8.05E-03 |
| 10.0                                     | 8.65E-02    | 7.87E-02 | 6.99E-02 | 6.29E-02 | 5.44E-02 | 4.52E-02 | 3.62E-02 | 2.60E-02 | 1.81E-02 | 9.00E-03 |

**TABLE 5B**

Absorbed Fractions to Active Bone Marrow (TAM) for  $\alpha$ -Emissions Within  
Femur Head of Leeds 44-Year Male for Various Source Tissues and Marrow Cellularities

| Energy<br>(MeV) | Femur Head                               |          |          |          |          |          |          |          |          |          |
|-----------------|------------------------------------------|----------|----------|----------|----------|----------|----------|----------|----------|----------|
|                 | $\phi(\text{TAM} \leftarrow \text{TAM})$ |          |          |          |          |          |          |          |          |          |
|                 | Cellularity                              |          |          |          |          |          |          |          |          |          |
|                 | 100%                                     | 90%      | 80%      | 70%      | 60%      | 50%      | 40%      | 30%      | 20%      | 10%      |
| 3.0             | 9.91E-01                                 | 9.72E-01 | 9.46E-01 | 9.19E-01 | 8.83E-01 | 8.47E-01 | 8.12E-01 | 7.64E-01 | 7.18E-01 | 6.45E-01 |
| 3.5             | 9.88E-01                                 | 9.65E-01 | 9.33E-01 | 8.99E-01 | 8.55E-01 | 8.11E-01 | 7.69E-01 | 7.13E-01 | 6.59E-01 | 5.78E-01 |
| 4.0             | 9.85E-01                                 | 9.57E-01 | 9.18E-01 | 8.77E-01 | 8.24E-01 | 7.75E-01 | 7.25E-01 | 6.62E-01 | 6.04E-01 | 5.14E-01 |
| 4.5             | 9.83E-01                                 | 9.48E-01 | 9.03E-01 | 8.56E-01 | 7.94E-01 | 7.38E-01 | 6.81E-01 | 6.13E-01 | 5.49E-01 | 4.57E-01 |
| 5.0             | 9.79E-01                                 | 9.40E-01 | 8.87E-01 | 8.33E-01 | 7.66E-01 | 7.02E-01 | 6.42E-01 | 5.67E-01 | 5.00E-01 | 4.04E-01 |
| 5.5             | 9.76E-01                                 | 9.31E-01 | 8.71E-01 | 8.12E-01 | 7.37E-01 | 6.69E-01 | 6.04E-01 | 5.24E-01 | 4.55E-01 | 3.59E-01 |
| 6.0             | 9.72E-01                                 | 9.23E-01 | 8.57E-01 | 7.92E-01 | 7.13E-01 | 6.40E-01 | 5.70E-01 | 4.87E-01 | 4.15E-01 | 3.20E-01 |
| 6.5             | 9.69E-01                                 | 9.13E-01 | 8.43E-01 | 7.73E-01 | 6.91E-01 | 6.14E-01 | 5.40E-01 | 4.55E-01 | 3.81E-01 | 2.87E-01 |
| 7.0             | 9.65E-01                                 | 9.06E-01 | 8.29E-01 | 7.58E-01 | 6.73E-01 | 5.92E-01 | 5.16E-01 | 4.27E-01 | 3.53E-01 | 2.59E-01 |
| 7.5             | 9.61E-01                                 | 8.98E-01 | 8.19E-01 | 7.44E-01 | 6.60E-01 | 5.75E-01 | 4.96E-01 | 4.05E-01 | 3.29E-01 | 2.37E-01 |
| 8.0             | 9.56E-01                                 | 8.91E-01 | 8.08E-01 | 7.33E-01 | 6.48E-01 | 5.62E-01 | 4.80E-01 | 3.87E-01 | 3.10E-01 | 2.18E-01 |
| 8.5             | 9.52E-01                                 | 8.83E-01 | 7.99E-01 | 7.24E-01 | 6.40E-01 | 5.52E-01 | 4.68E-01 | 3.73E-01 | 2.96E-01 | 2.03E-01 |
| 9.0             | 9.48E-01                                 | 8.77E-01 | 7.92E-01 | 7.17E-01 | 6.33E-01 | 5.44E-01 | 4.58E-01 | 3.62E-01 | 2.84E-01 | 1.91E-01 |
| 9.5             | 9.43E-01                                 | 8.71E-01 | 7.86E-01 | 7.11E-01 | 6.28E-01 | 5.37E-01 | 4.51E-01 | 3.53E-01 | 2.74E-01 | 1.82E-01 |
| 10.0            | 9.39E-01                                 | 8.65E-01 | 7.80E-01 | 7.06E-01 | 6.24E-01 | 5.32E-01 | 4.44E-01 | 3.45E-01 | 2.66E-01 | 1.74E-01 |

  

| Energy<br>(MeV) | $\phi(\text{TAM} \leftarrow \text{TBE})$ |          |          |          |          |          |          |          |          |          |
|-----------------|------------------------------------------|----------|----------|----------|----------|----------|----------|----------|----------|----------|
|                 | Cellularity                              |          |          |          |          |          |          |          |          |          |
|                 | 100%                                     | 90%      | 80%      | 70%      | 60%      | 50%      | 40%      | 30%      | 20%      | 10%      |
| 3.0             | 2.63E-01                                 | 2.37E-01 | 2.11E-01 | 1.88E-01 | 1.64E-01 | 1.36E-01 | 1.08E-01 | 7.82E-02 | 5.41E-02 | 2.71E-02 |
| 3.5             | 3.00E-01                                 | 2.72E-01 | 2.42E-01 | 2.15E-01 | 1.88E-01 | 1.55E-01 | 1.25E-01 | 8.94E-02 | 6.21E-02 | 3.09E-02 |
| 4.0             | 3.30E-01                                 | 2.99E-01 | 2.65E-01 | 2.36E-01 | 2.05E-01 | 1.70E-01 | 1.36E-01 | 9.79E-02 | 6.76E-02 | 3.38E-02 |
| 4.5             | 3.53E-01                                 | 3.20E-01 | 2.84E-01 | 2.53E-01 | 2.20E-01 | 1.82E-01 | 1.46E-01 | 1.05E-01 | 7.25E-02 | 3.64E-02 |
| 5.0             | 3.70E-01                                 | 3.37E-01 | 2.99E-01 | 2.66E-01 | 2.32E-01 | 1.92E-01 | 1.54E-01 | 1.10E-01 | 7.60E-02 | 3.84E-02 |
| 5.5             | 3.86E-01                                 | 3.50E-01 | 3.11E-01 | 2.76E-01 | 2.41E-01 | 2.00E-01 | 1.60E-01 | 1.15E-01 | 7.93E-02 | 3.99E-02 |
| 6.0             | 3.99E-01                                 | 3.62E-01 | 3.21E-01 | 2.86E-01 | 2.49E-01 | 2.06E-01 | 1.65E-01 | 1.18E-01 | 8.19E-02 | 4.09E-02 |
| 6.5             | 4.09E-01                                 | 3.72E-01 | 3.30E-01 | 2.93E-01 | 2.56E-01 | 2.11E-01 | 1.69E-01 | 1.22E-01 | 8.42E-02 | 4.21E-02 |
| 7.0             | 4.19E-01                                 | 3.80E-01 | 3.37E-01 | 3.00E-01 | 2.61E-01 | 2.16E-01 | 1.73E-01 | 1.24E-01 | 8.64E-02 | 4.32E-02 |
| 7.5             | 4.27E-01                                 | 3.87E-01 | 3.43E-01 | 3.06E-01 | 2.67E-01 | 2.20E-01 | 1.76E-01 | 1.27E-01 | 8.73E-02 | 4.39E-02 |
| 8.0             | 4.35E-01                                 | 3.94E-01 | 3.50E-01 | 3.11E-01 | 2.72E-01 | 2.24E-01 | 1.79E-01 | 1.29E-01 | 8.92E-02 | 4.47E-02 |
| 8.5             | 4.41E-01                                 | 4.00E-01 | 3.55E-01 | 3.16E-01 | 2.76E-01 | 2.27E-01 | 1.82E-01 | 1.31E-01 | 9.05E-02 | 4.52E-02 |
| 9.0             | 4.47E-01                                 | 4.06E-01 | 3.60E-01 | 3.21E-01 | 2.79E-01 | 2.30E-01 | 1.85E-01 | 1.33E-01 | 9.17E-02 | 4.60E-02 |
| 9.5             | 4.53E-01                                 | 4.11E-01 | 3.65E-01 | 3.24E-01 | 2.83E-01 | 2.33E-01 | 1.87E-01 | 1.35E-01 | 9.28E-02 | 4.64E-02 |
| 10.0            | 4.59E-01                                 | 4.16E-01 | 3.68E-01 | 3.29E-01 | 2.86E-01 | 2.36E-01 | 1.89E-01 | 1.36E-01 | 9.42E-02 | 4.70E-02 |

TABLE 5B (Continued)

| Femur Head                               |             |          |          |          |          |          |          |          |          |          |
|------------------------------------------|-------------|----------|----------|----------|----------|----------|----------|----------|----------|----------|
| $\phi(\text{TAM} \leftarrow \text{TBS})$ |             |          |          |          |          |          |          |          |          |          |
| Energy<br>(MeV)                          | Cellularity |          |          |          |          |          |          |          |          |          |
|                                          | 100%        | 90%      | 80%      | 70%      | 60%      | 50%      | 40%      | 30%      | 20%      | 10%      |
| 3.0                                      | 5.96E-02    | 5.41E-02 | 4.79E-02 | 4.27E-02 | 3.71E-02 | 3.07E-02 | 2.46E-02 | 1.79E-02 | 1.22E-02 | 6.15E-03 |
| 3.5                                      | 1.05E-01    | 9.50E-02 | 8.46E-02 | 7.52E-02 | 6.56E-02 | 5.42E-02 | 4.38E-02 | 3.13E-02 | 2.16E-02 | 1.08E-02 |
| 4.0                                      | 1.48E-01    | 1.34E-01 | 1.19E-01 | 1.06E-01 | 9.23E-02 | 7.66E-02 | 6.11E-02 | 4.40E-02 | 3.05E-02 | 1.51E-02 |
| 4.5                                      | 1.86E-01    | 1.68E-01 | 1.49E-01 | 1.33E-01 | 1.16E-01 | 9.55E-02 | 7.65E-02 | 5.50E-02 | 3.79E-02 | 1.91E-02 |
| 5.0                                      | 2.16E-01    | 1.97E-01 | 1.75E-01 | 1.56E-01 | 1.35E-01 | 1.12E-01 | 8.96E-02 | 6.47E-02 | 4.48E-02 | 2.24E-02 |
| 5.5                                      | 2.43E-01    | 2.21E-01 | 1.96E-01 | 1.75E-01 | 1.53E-01 | 1.26E-01 | 1.01E-01 | 7.24E-02 | 5.02E-02 | 2.52E-02 |
| 6.0                                      | 2.65E-01    | 2.41E-01 | 2.14E-01 | 1.90E-01 | 1.66E-01 | 1.37E-01 | 1.10E-01 | 7.91E-02 | 5.46E-02 | 2.75E-02 |
| 6.5                                      | 2.84E-01    | 2.57E-01 | 2.28E-01 | 2.04E-01 | 1.78E-01 | 1.47E-01 | 1.18E-01 | 8.50E-02 | 5.85E-02 | 2.93E-02 |
| 7.0                                      | 3.01E-01    | 2.74E-01 | 2.43E-01 | 2.17E-01 | 1.88E-01 | 1.56E-01 | 1.25E-01 | 9.06E-02 | 6.22E-02 | 3.12E-02 |
| 7.5                                      | 3.17E-01    | 2.88E-01 | 2.55E-01 | 2.27E-01 | 1.99E-01 | 1.64E-01 | 1.32E-01 | 9.46E-02 | 6.55E-02 | 3.28E-02 |
| 8.0                                      | 3.31E-01    | 2.99E-01 | 2.67E-01 | 2.38E-01 | 2.07E-01 | 1.71E-01 | 1.37E-01 | 9.89E-02 | 6.82E-02 | 3.41E-02 |
| 8.5                                      | 3.42E-01    | 3.10E-01 | 2.76E-01 | 2.45E-01 | 2.15E-01 | 1.77E-01 | 1.43E-01 | 1.02E-01 | 7.09E-02 | 3.54E-02 |
| 9.0                                      | 3.54E-01    | 3.21E-01 | 2.85E-01 | 2.54E-01 | 2.22E-01 | 1.83E-01 | 1.47E-01 | 1.05E-01 | 7.29E-02 | 3.67E-02 |
| 9.5                                      | 3.64E-01    | 3.30E-01 | 2.94E-01 | 2.62E-01 | 2.29E-01 | 1.89E-01 | 1.52E-01 | 1.09E-01 | 7.51E-02 | 3.75E-02 |
| 10.0                                     | 3.74E-01    | 3.39E-01 | 3.01E-01 | 2.69E-01 | 2.35E-01 | 1.94E-01 | 1.55E-01 | 1.11E-01 | 7.70E-02 | 3.84E-02 |
| $\phi(\text{TAM} \leftarrow \text{TBV})$ |             |          |          |          |          |          |          |          |          |          |
| Energy<br>(MeV)                          | Cellularity |          |          |          |          |          |          |          |          |          |
|                                          | 100%        | 90%      | 80%      | 70%      | 60%      | 50%      | 40%      | 30%      | 20%      | 10%      |
| 3.0                                      | 1.08E-03    | 9.80E-04 | 8.57E-04 | 7.46E-04 | 6.54E-04 | 5.78E-04 | 4.25E-04 | 3.16E-04 | 2.14E-04 | 1.05E-04 |
| 3.5                                      | 2.73E-03    | 2.47E-03 | 2.24E-03 | 2.03E-03 | 1.70E-03 | 1.44E-03 | 1.13E-03 | 7.93E-04 | 5.64E-04 | 2.95E-04 |
| 4.0                                      | 5.55E-03    | 5.06E-03 | 4.51E-03 | 4.06E-03 | 3.44E-03 | 2.92E-03 | 2.33E-03 | 1.69E-03 | 1.16E-03 | 5.67E-04 |
| 4.5                                      | 9.63E-03    | 8.59E-03 | 7.80E-03 | 6.92E-03 | 5.95E-03 | 4.89E-03 | 3.99E-03 | 2.85E-03 | 1.96E-03 | 1.02E-03 |
| 5.0                                      | 1.46E-02    | 1.33E-02 | 1.16E-02 | 1.04E-02 | 9.05E-03 | 7.54E-03 | 5.98E-03 | 4.34E-03 | 2.95E-03 | 1.50E-03 |
| 5.5                                      | 2.05E-02    | 1.87E-02 | 1.66E-02 | 1.47E-02 | 1.27E-02 | 1.06E-02 | 8.46E-03 | 6.13E-03 | 4.24E-03 | 2.16E-03 |
| 6.0                                      | 2.74E-02    | 2.47E-02 | 2.20E-02 | 1.95E-02 | 1.70E-02 | 1.43E-02 | 1.14E-02 | 8.25E-03 | 5.69E-03 | 2.83E-03 |
| 6.5                                      | 3.49E-02    | 3.19E-02 | 2.84E-02 | 2.53E-02 | 2.23E-02 | 1.82E-02 | 1.46E-02 | 1.04E-02 | 7.34E-03 | 3.63E-03 |
| 7.0                                      | 4.36E-02    | 3.96E-02 | 3.52E-02 | 3.16E-02 | 2.75E-02 | 2.25E-02 | 1.81E-02 | 1.30E-02 | 8.96E-03 | 4.54E-03 |
| 7.5                                      | 5.29E-02    | 4.81E-02 | 4.27E-02 | 3.81E-02 | 3.31E-02 | 2.76E-02 | 2.20E-02 | 1.58E-02 | 1.09E-02 | 5.54E-03 |
| 8.0                                      | 6.31E-02    | 5.73E-02 | 5.08E-02 | 4.53E-02 | 3.96E-02 | 3.26E-02 | 2.63E-02 | 1.89E-02 | 1.30E-02 | 6.56E-03 |
| 8.5                                      | 7.42E-02    | 6.72E-02 | 5.95E-02 | 5.34E-02 | 4.62E-02 | 3.83E-02 | 3.06E-02 | 2.22E-02 | 1.53E-02 | 7.61E-03 |
| 9.0                                      | 8.52E-02    | 7.75E-02 | 6.94E-02 | 6.14E-02 | 5.34E-02 | 4.44E-02 | 3.57E-02 | 2.57E-02 | 1.75E-02 | 8.84E-03 |
| 9.5                                      | 9.78E-02    | 8.85E-02 | 7.85E-02 | 7.03E-02 | 6.10E-02 | 5.03E-02 | 4.05E-02 | 2.91E-02 | 2.01E-02 | 1.00E-02 |
| 10.0                                     | 1.10E-01    | 9.99E-02 | 8.91E-02 | 7.93E-02 | 6.91E-02 | 5.73E-02 | 4.59E-02 | 3.31E-02 | 2.29E-02 | 1.14E-02 |

**TABLE 6B**

Absorbed Fractions to Active Bone Marrow (TAM) for  $\alpha$ -Emissions Within  
Femur Neck of Leeds 44-Year Male for Various Source Tissues and Marrow Cellularities

| Energy<br>(MeV) | Femur Neck                               |          |          |          |          |          |          |          |          |          |
|-----------------|------------------------------------------|----------|----------|----------|----------|----------|----------|----------|----------|----------|
|                 | $\phi(\text{TAM} \leftarrow \text{TAM})$ |          |          |          |          |          |          |          |          |          |
|                 | Cellularity                              |          |          |          |          |          |          |          |          |          |
|                 | 100%                                     | 90%      | 80%      | 70%      | 60%      | 50%      | 40%      | 30%      | 20%      | 10%      |
| 3.0             | 9.93E-01                                 | 9.74E-01 | 9.49E-01 | 9.21E-01 | 8.85E-01 | 8.50E-01 | 8.13E-01 | 7.66E-01 | 7.20E-01 | 6.47E-01 |
| 3.5             | 9.92E-01                                 | 9.68E-01 | 9.36E-01 | 9.02E-01 | 8.58E-01 | 8.14E-01 | 7.71E-01 | 7.16E-01 | 6.62E-01 | 5.79E-01 |
| 4.0             | 9.90E-01                                 | 9.61E-01 | 9.22E-01 | 8.81E-01 | 8.29E-01 | 7.78E-01 | 7.28E-01 | 6.65E-01 | 6.05E-01 | 5.16E-01 |
| 4.5             | 9.88E-01                                 | 9.53E-01 | 9.07E-01 | 8.60E-01 | 7.98E-01 | 7.41E-01 | 6.86E-01 | 6.16E-01 | 5.52E-01 | 4.58E-01 |
| 5.0             | 9.86E-01                                 | 9.46E-01 | 8.93E-01 | 8.39E-01 | 7.70E-01 | 7.07E-01 | 6.45E-01 | 5.69E-01 | 5.03E-01 | 4.07E-01 |
| 5.5             | 9.83E-01                                 | 9.38E-01 | 8.78E-01 | 8.18E-01 | 7.43E-01 | 6.74E-01 | 6.07E-01 | 5.28E-01 | 4.57E-01 | 3.62E-01 |
| 6.0             | 9.81E-01                                 | 9.30E-01 | 8.64E-01 | 7.98E-01 | 7.19E-01 | 6.45E-01 | 5.74E-01 | 4.91E-01 | 4.18E-01 | 3.22E-01 |
| 6.5             | 9.78E-01                                 | 9.23E-01 | 8.51E-01 | 7.81E-01 | 6.97E-01 | 6.19E-01 | 5.45E-01 | 4.58E-01 | 3.84E-01 | 2.89E-01 |
| 7.0             | 9.76E-01                                 | 9.16E-01 | 8.38E-01 | 7.65E-01 | 6.80E-01 | 5.98E-01 | 5.20E-01 | 4.31E-01 | 3.56E-01 | 2.61E-01 |
| 7.5             | 9.73E-01                                 | 9.09E-01 | 8.28E-01 | 7.53E-01 | 6.66E-01 | 5.81E-01 | 5.02E-01 | 4.08E-01 | 3.32E-01 | 2.38E-01 |
| 8.0             | 9.70E-01                                 | 9.03E-01 | 8.19E-01 | 7.43E-01 | 6.56E-01 | 5.68E-01 | 4.86E-01 | 3.90E-01 | 3.13E-01 | 2.19E-01 |
| 8.5             | 9.67E-01                                 | 8.97E-01 | 8.11E-01 | 7.34E-01 | 6.48E-01 | 5.58E-01 | 4.74E-01 | 3.77E-01 | 2.98E-01 | 2.05E-01 |
| 9.0             | 9.64E-01                                 | 8.91E-01 | 8.04E-01 | 7.27E-01 | 6.43E-01 | 5.51E-01 | 4.65E-01 | 3.66E-01 | 2.87E-01 | 1.94E-01 |
| 9.5             | 9.61E-01                                 | 8.87E-01 | 7.99E-01 | 7.22E-01 | 6.38E-01 | 5.44E-01 | 4.57E-01 | 3.58E-01 | 2.78E-01 | 1.84E-01 |
| 10.0            | 9.57E-01                                 | 8.82E-01 | 7.95E-01 | 7.18E-01 | 6.35E-01 | 5.40E-01 | 4.51E-01 | 3.51E-01 | 2.70E-01 | 1.76E-01 |

  

| Energy<br>(MeV) | $\phi(\text{TAM} \leftarrow \text{TBE})$ |          |          |          |          |          |          |          |          |          |
|-----------------|------------------------------------------|----------|----------|----------|----------|----------|----------|----------|----------|----------|
|                 | Cellularity                              |          |          |          |          |          |          |          |          |          |
|                 | 100%                                     | 90%      | 80%      | 70%      | 60%      | 50%      | 40%      | 30%      | 20%      | 10%      |
| 3.0             | 2.62E-01                                 | 2.37E-01 | 2.11E-01 | 1.88E-01 | 1.64E-01 | 1.35E-01 | 1.08E-01 | 7.80E-02 | 5.41E-02 | 2.70E-02 |
| 3.5             | 3.01E-01                                 | 2.72E-01 | 2.42E-01 | 2.15E-01 | 1.87E-01 | 1.55E-01 | 1.25E-01 | 8.93E-02 | 6.16E-02 | 3.11E-02 |
| 4.0             | 3.30E-01                                 | 2.99E-01 | 2.66E-01 | 2.37E-01 | 2.06E-01 | 1.70E-01 | 1.36E-01 | 9.82E-02 | 6.77E-02 | 3.40E-02 |
| 4.5             | 3.52E-01                                 | 3.19E-01 | 2.84E-01 | 2.53E-01 | 2.20E-01 | 1.81E-01 | 1.47E-01 | 1.05E-01 | 7.26E-02 | 3.64E-02 |
| 5.0             | 3.71E-01                                 | 3.37E-01 | 2.99E-01 | 2.66E-01 | 2.32E-01 | 1.92E-01 | 1.54E-01 | 1.10E-01 | 7.64E-02 | 3.83E-02 |
| 5.5             | 3.87E-01                                 | 3.51E-01 | 3.12E-01 | 2.78E-01 | 2.43E-01 | 2.00E-01 | 1.60E-01 | 1.15E-01 | 7.97E-02 | 4.01E-02 |
| 6.0             | 4.00E-01                                 | 3.63E-01 | 3.22E-01 | 2.87E-01 | 2.50E-01 | 2.06E-01 | 1.66E-01 | 1.19E-01 | 8.24E-02 | 4.11E-02 |
| 6.5             | 4.11E-01                                 | 3.73E-01 | 3.31E-01 | 2.95E-01 | 2.58E-01 | 2.12E-01 | 1.70E-01 | 1.23E-01 | 8.45E-02 | 4.21E-02 |
| 7.0             | 4.22E-01                                 | 3.82E-01 | 3.39E-01 | 3.02E-01 | 2.63E-01 | 2.17E-01 | 1.74E-01 | 1.25E-01 | 8.63E-02 | 4.33E-02 |
| 7.5             | 4.31E-01                                 | 3.90E-01 | 3.46E-01 | 3.08E-01 | 2.68E-01 | 2.21E-01 | 1.79E-01 | 1.28E-01 | 8.81E-02 | 4.43E-02 |
| 8.0             | 4.40E-01                                 | 3.98E-01 | 3.53E-01 | 3.15E-01 | 2.74E-01 | 2.26E-01 | 1.81E-01 | 1.30E-01 | 9.02E-02 | 4.52E-02 |
| 8.5             | 4.48E-01                                 | 4.06E-01 | 3.60E-01 | 3.21E-01 | 2.80E-01 | 2.30E-01 | 1.85E-01 | 1.33E-01 | 9.21E-02 | 4.59E-02 |
| 9.0             | 4.56E-01                                 | 4.12E-01 | 3.67E-01 | 3.26E-01 | 2.84E-01 | 2.34E-01 | 1.88E-01 | 1.35E-01 | 9.34E-02 | 4.67E-02 |
| 9.5             | 4.62E-01                                 | 4.19E-01 | 3.72E-01 | 3.31E-01 | 2.89E-01 | 2.38E-01 | 1.90E-01 | 1.37E-01 | 9.44E-02 | 4.75E-02 |
| 10.0            | 4.69E-01                                 | 4.25E-01 | 3.77E-01 | 3.36E-01 | 2.93E-01 | 2.41E-01 | 1.93E-01 | 1.39E-01 | 9.59E-02 | 4.80E-02 |



TABLE 6B (Continued)

| Femur Neck                               |             |          |          |          |          |          |          |          |          |          |
|------------------------------------------|-------------|----------|----------|----------|----------|----------|----------|----------|----------|----------|
| $\phi(\text{TAM} \leftarrow \text{TBS})$ |             |          |          |          |          |          |          |          |          |          |
| Energy<br>(MeV)                          | Cellularity |          |          |          |          |          |          |          |          |          |
|                                          | 100%        | 90%      | 80%      | 70%      | 60%      | 50%      | 40%      | 30%      | 20%      | 10%      |
| 3.0                                      | 5.83E-02    | 5.28E-02 | 4.71E-02 | 4.19E-02 | 3.64E-02 | 3.01E-02 | 2.43E-02 | 1.73E-02 | 1.20E-02 | 6.11E-03 |
| 3.5                                      | 1.04E-01    | 9.43E-02 | 8.36E-02 | 7.43E-02 | 6.51E-02 | 5.34E-02 | 4.32E-02 | 3.11E-02 | 2.13E-02 | 1.07E-02 |
| 4.0                                      | 1.47E-01    | 1.33E-01 | 1.18E-01 | 1.05E-01 | 9.17E-02 | 7.59E-02 | 6.08E-02 | 4.36E-02 | 3.02E-02 | 1.52E-02 |
| 4.5                                      | 1.84E-01    | 1.67E-01 | 1.48E-01 | 1.32E-01 | 1.15E-01 | 9.51E-02 | 7.63E-02 | 5.44E-02 | 3.79E-02 | 1.91E-02 |
| 5.0                                      | 2.17E-01    | 1.97E-01 | 1.74E-01 | 1.56E-01 | 1.35E-01 | 1.12E-01 | 9.00E-02 | 6.45E-02 | 4.47E-02 | 2.26E-02 |
| 5.5                                      | 2.43E-01    | 2.21E-01 | 1.96E-01 | 1.74E-01 | 1.52E-01 | 1.26E-01 | 1.01E-01 | 7.24E-02 | 5.03E-02 | 2.52E-02 |
| 6.0                                      | 2.65E-01    | 2.41E-01 | 2.14E-01 | 1.91E-01 | 1.66E-01 | 1.37E-01 | 1.11E-01 | 7.93E-02 | 5.51E-02 | 2.77E-02 |
| 6.5                                      | 2.85E-01    | 2.59E-01 | 2.30E-01 | 2.05E-01 | 1.79E-01 | 1.47E-01 | 1.19E-01 | 8.54E-02 | 5.88E-02 | 2.95E-02 |
| 7.0                                      | 3.03E-01    | 2.75E-01 | 2.44E-01 | 2.18E-01 | 1.90E-01 | 1.57E-01 | 1.26E-01 | 9.10E-02 | 6.28E-02 | 3.14E-02 |
| 7.5                                      | 3.20E-01    | 2.90E-01 | 2.59E-01 | 2.30E-01 | 2.01E-01 | 1.66E-01 | 1.33E-01 | 9.59E-02 | 6.64E-02 | 3.34E-02 |
| 8.0                                      | 3.34E-01    | 3.04E-01 | 2.71E-01 | 2.42E-01 | 2.10E-01 | 1.74E-01 | 1.40E-01 | 1.00E-01 | 6.94E-02 | 3.48E-02 |
| 8.5                                      | 3.50E-01    | 3.18E-01 | 2.81E-01 | 2.51E-01 | 2.19E-01 | 1.81E-01 | 1.45E-01 | 1.04E-01 | 7.23E-02 | 3.63E-02 |
| 9.0                                      | 3.61E-01    | 3.28E-01 | 2.92E-01 | 2.60E-01 | 2.27E-01 | 1.87E-01 | 1.50E-01 | 1.08E-01 | 7.46E-02 | 3.73E-02 |
| 9.5                                      | 3.74E-01    | 3.39E-01 | 3.01E-01 | 2.69E-01 | 2.35E-01 | 1.93E-01 | 1.55E-01 | 1.12E-01 | 7.70E-02 | 3.86E-02 |
| 10.0                                     | 3.84E-01    | 3.49E-01 | 3.10E-01 | 2.77E-01 | 2.41E-01 | 1.99E-01 | 1.60E-01 | 1.15E-01 | 7.90E-02 | 3.95E-02 |
| $\phi(\text{TAM} \leftarrow \text{TBV})$ |             |          |          |          |          |          |          |          |          |          |
| Energy<br>(MeV)                          | Cellularity |          |          |          |          |          |          |          |          |          |
|                                          | 100%        | 90%      | 80%      | 70%      | 60%      | 50%      | 40%      | 30%      | 20%      | 10%      |
| 3.0                                      | 7.57E-04    | 6.64E-04 | 5.56E-04 | 5.47E-04 | 4.63E-04 | 3.99E-04 | 3.02E-04 | 2.11E-04 | 1.55E-04 | 7.70E-05 |
| 3.5                                      | 1.99E-03    | 1.79E-03 | 1.61E-03 | 1.42E-03 | 1.27E-03 | 1.04E-03 | 8.42E-04 | 6.04E-04 | 4.05E-04 | 1.99E-04 |
| 4.0                                      | 4.04E-03    | 3.72E-03 | 3.17E-03 | 2.91E-03 | 2.53E-03 | 2.11E-03 | 1.67E-03 | 1.21E-03 | 8.28E-04 | 4.17E-04 |
| 4.5                                      | 6.94E-03    | 6.35E-03 | 5.58E-03 | 4.99E-03 | 4.31E-03 | 3.59E-03 | 2.84E-03 | 2.08E-03 | 1.44E-03 | 7.28E-04 |
| 5.0                                      | 1.06E-02    | 9.61E-03 | 8.49E-03 | 7.46E-03 | 6.52E-03 | 5.48E-03 | 4.43E-03 | 3.15E-03 | 2.20E-03 | 1.07E-03 |
| 5.5                                      | 1.49E-02    | 1.36E-02 | 1.21E-02 | 1.07E-02 | 9.33E-03 | 7.59E-03 | 6.15E-03 | 4.49E-03 | 3.09E-03 | 1.59E-03 |
| 6.0                                      | 1.98E-02    | 1.80E-02 | 1.61E-02 | 1.44E-02 | 1.24E-02 | 1.03E-02 | 8.14E-03 | 5.90E-03 | 4.15E-03 | 2.09E-03 |
| 6.5                                      | 2.56E-02    | 2.30E-02 | 2.03E-02 | 1.82E-02 | 1.60E-02 | 1.31E-02 | 1.05E-02 | 7.63E-03 | 5.23E-03 | 2.58E-03 |
| 7.0                                      | 3.18E-02    | 2.88E-02 | 2.57E-02 | 2.28E-02 | 1.99E-02 | 1.62E-02 | 1.31E-02 | 9.42E-03 | 6.46E-03 | 3.31E-03 |
| 7.5                                      | 3.84E-02    | 3.48E-02 | 3.10E-02 | 2.75E-02 | 2.40E-02 | 1.99E-02 | 1.59E-02 | 1.15E-02 | 7.92E-03 | 3.99E-03 |
| 8.0                                      | 4.56E-02    | 4.13E-02 | 3.66E-02 | 3.28E-02 | 2.85E-02 | 2.36E-02 | 1.89E-02 | 1.35E-02 | 9.45E-03 | 4.78E-03 |
| 8.5                                      | 5.29E-02    | 4.83E-02 | 4.27E-02 | 3.84E-02 | 3.34E-02 | 2.74E-02 | 2.22E-02 | 1.58E-02 | 1.10E-02 | 5.57E-03 |
| 9.0                                      | 6.12E-02    | 5.56E-02 | 4.93E-02 | 4.41E-02 | 3.84E-02 | 3.18E-02 | 2.53E-02 | 1.82E-02 | 1.28E-02 | 6.34E-03 |
| 9.5                                      | 6.97E-02    | 6.34E-02 | 5.63E-02 | 5.01E-02 | 4.39E-02 | 3.61E-02 | 2.90E-02 | 2.09E-02 | 1.43E-02 | 7.20E-03 |
| 10.0                                     | 7.88E-02    | 7.17E-02 | 6.31E-02 | 5.66E-02 | 4.97E-02 | 4.08E-02 | 3.27E-02 | 2.35E-02 | 1.63E-02 | 8.15E-03 |

**TABLE 7B**

Absorbed Fractions to Active Bone Marrow (TAM) for  $\alpha$ -Emissions Within Iliac Crest of Leeds 44-Year Male for Various Source Tissues and Marrow Cellularities

| Energy<br>(MeV) | Iliac Crest                              |          |          |          |          |          |          |          |          |          |
|-----------------|------------------------------------------|----------|----------|----------|----------|----------|----------|----------|----------|----------|
|                 | $\phi(\text{TAM} \leftarrow \text{TAM})$ |          |          |          |          |          |          |          |          |          |
|                 | Cellularity                              |          |          |          |          |          |          |          |          |          |
|                 | 100%                                     | 90%      | 80%      | 70%      | 60%      | 50%      | 40%      | 30%      | 20%      | 10%      |
| 3.0             | 9.87E-01                                 | 9.69E-01 | 9.43E-01 | 9.16E-01 | 8.80E-01 | 8.45E-01 | 8.08E-01 | 7.62E-01 | 7.16E-01 | 6.43E-01 |
| 3.5             | 9.84E-01                                 | 9.60E-01 | 9.29E-01 | 8.95E-01 | 8.52E-01 | 8.08E-01 | 7.66E-01 | 7.10E-01 | 6.58E-01 | 5.76E-01 |
| 4.0             | 9.80E-01                                 | 9.52E-01 | 9.13E-01 | 8.73E-01 | 8.20E-01 | 7.71E-01 | 7.22E-01 | 6.59E-01 | 6.00E-01 | 5.13E-01 |
| 4.5             | 9.77E-01                                 | 9.43E-01 | 8.97E-01 | 8.50E-01 | 7.90E-01 | 7.34E-01 | 6.78E-01 | 6.10E-01 | 5.46E-01 | 4.54E-01 |
| 5.0             | 9.73E-01                                 | 9.33E-01 | 8.81E-01 | 8.28E-01 | 7.60E-01 | 6.99E-01 | 6.38E-01 | 5.64E-01 | 4.96E-01 | 4.03E-01 |
| 5.5             | 9.68E-01                                 | 9.24E-01 | 8.65E-01 | 8.06E-01 | 7.32E-01 | 6.65E-01 | 6.00E-01 | 5.22E-01 | 4.52E-01 | 3.57E-01 |
| 6.0             | 9.64E-01                                 | 9.14E-01 | 8.49E-01 | 7.85E-01 | 7.07E-01 | 6.35E-01 | 5.66E-01 | 4.84E-01 | 4.13E-01 | 3.18E-01 |
| 6.5             | 9.59E-01                                 | 9.05E-01 | 8.34E-01 | 7.66E-01 | 6.85E-01 | 6.08E-01 | 5.35E-01 | 4.50E-01 | 3.78E-01 | 2.85E-01 |
| 7.0             | 9.54E-01                                 | 8.95E-01 | 8.20E-01 | 7.49E-01 | 6.66E-01 | 5.87E-01 | 5.11E-01 | 4.23E-01 | 3.50E-01 | 2.58E-01 |
| 7.5             | 9.49E-01                                 | 8.86E-01 | 8.08E-01 | 7.35E-01 | 6.51E-01 | 5.69E-01 | 4.90E-01 | 4.00E-01 | 3.26E-01 | 2.35E-01 |
| 8.0             | 9.43E-01                                 | 8.78E-01 | 7.97E-01 | 7.23E-01 | 6.40E-01 | 5.55E-01 | 4.75E-01 | 3.83E-01 | 3.07E-01 | 2.16E-01 |
| 8.5             | 9.37E-01                                 | 8.70E-01 | 7.87E-01 | 7.13E-01 | 6.32E-01 | 5.44E-01 | 4.63E-01 | 3.68E-01 | 2.92E-01 | 2.02E-01 |
| 9.0             | 9.31E-01                                 | 8.62E-01 | 7.79E-01 | 7.05E-01 | 6.23E-01 | 5.35E-01 | 4.53E-01 | 3.57E-01 | 2.80E-01 | 1.90E-01 |
| 9.5             | 9.25E-01                                 | 8.55E-01 | 7.72E-01 | 6.99E-01 | 6.19E-01 | 5.29E-01 | 4.45E-01 | 3.48E-01 | 2.71E-01 | 1.80E-01 |
| 10.0            | 9.19E-01                                 | 8.49E-01 | 7.66E-01 | 6.93E-01 | 6.13E-01 | 5.22E-01 | 4.38E-01 | 3.41E-01 | 2.63E-01 | 1.72E-01 |
|                 | $\phi(\text{TAM} \leftarrow \text{TBE})$ |          |          |          |          |          |          |          |          |          |
|                 | Cellularity                              |          |          |          |          |          |          |          |          |          |
|                 | 100%                                     | 90%      | 80%      | 70%      | 60%      | 50%      | 40%      | 30%      | 20%      | 10%      |
| 3.0             | 2.62E-01                                 | 2.37E-01 | 2.11E-01 | 1.88E-01 | 1.64E-01 | 1.35E-01 | 1.09E-01 | 7.79E-02 | 5.40E-02 | 2.70E-02 |
| 3.5             | 3.00E-01                                 | 2.72E-01 | 2.42E-01 | 2.15E-01 | 1.88E-01 | 1.55E-01 | 1.24E-01 | 8.93E-02 | 6.18E-02 | 3.09E-02 |
| 4.0             | 3.30E-01                                 | 2.99E-01 | 2.65E-01 | 2.36E-01 | 2.05E-01 | 1.70E-01 | 1.37E-01 | 9.81E-02 | 6.78E-02 | 3.39E-02 |
| 4.5             | 3.53E-01                                 | 3.20E-01 | 2.85E-01 | 2.53E-01 | 2.20E-01 | 1.82E-01 | 1.46E-01 | 1.05E-01 | 7.27E-02 | 3.65E-02 |
| 5.0             | 3.72E-01                                 | 3.37E-01 | 3.00E-01 | 2.67E-01 | 2.32E-01 | 1.92E-01 | 1.54E-01 | 1.11E-01 | 7.62E-02 | 3.82E-02 |
| 5.5             | 3.88E-01                                 | 3.51E-01 | 3.12E-01 | 2.77E-01 | 2.42E-01 | 2.00E-01 | 1.60E-01 | 1.15E-01 | 7.97E-02 | 3.97E-02 |
| 6.0             | 4.01E-01                                 | 3.62E-01 | 3.23E-01 | 2.87E-01 | 2.51E-01 | 2.07E-01 | 1.66E-01 | 1.19E-01 | 8.26E-02 | 4.15E-02 |
| 6.5             | 4.12E-01                                 | 3.74E-01 | 3.32E-01 | 2.95E-01 | 2.58E-01 | 2.12E-01 | 1.70E-01 | 1.23E-01 | 8.47E-02 | 4.24E-02 |
| 7.0             | 4.22E-01                                 | 3.82E-01 | 3.39E-01 | 3.02E-01 | 2.63E-01 | 2.18E-01 | 1.75E-01 | 1.26E-01 | 8.67E-02 | 4.35E-02 |
| 7.5             | 4.31E-01                                 | 3.90E-01 | 3.47E-01 | 3.09E-01 | 2.69E-01 | 2.22E-01 | 1.79E-01 | 1.28E-01 | 8.83E-02 | 4.43E-02 |
| 8.0             | 4.40E-01                                 | 3.98E-01 | 3.53E-01 | 3.15E-01 | 2.74E-01 | 2.26E-01 | 1.82E-01 | 1.30E-01 | 9.03E-02 | 4.53E-02 |
| 8.5             | 4.47E-01                                 | 4.05E-01 | 3.59E-01 | 3.20E-01 | 2.79E-01 | 2.30E-01 | 1.84E-01 | 1.33E-01 | 9.16E-02 | 4.59E-02 |
| 9.0             | 4.54E-01                                 | 4.11E-01 | 3.65E-01 | 3.24E-01 | 2.84E-01 | 2.33E-01 | 1.87E-01 | 1.35E-01 | 9.33E-02 | 4.66E-02 |
| 9.5             | 4.60E-01                                 | 4.18E-01 | 3.69E-01 | 3.30E-01 | 2.87E-01 | 2.37E-01 | 1.90E-01 | 1.37E-01 | 9.45E-02 | 4.72E-02 |
| 10.0            | 4.66E-01                                 | 4.23E-01 | 3.75E-01 | 3.34E-01 | 2.92E-01 | 2.40E-01 | 1.92E-01 | 1.39E-01 | 9.56E-02 | 4.79E-02 |

TABLE 7B (Continued)

| Iliac Crest                              |             |          |          |          |          |          |          |          |          |          |
|------------------------------------------|-------------|----------|----------|----------|----------|----------|----------|----------|----------|----------|
| $\phi(\text{TAM} \leftarrow \text{TBS})$ |             |          |          |          |          |          |          |          |          |          |
| Energy<br>(MeV)                          | Cellularity |          |          |          |          |          |          |          |          |          |
|                                          | 100%        | 90%      | 80%      | 70%      | 60%      | 50%      | 40%      | 30%      | 20%      | 10%      |
| 3.0                                      | 6.00E-02    | 5.47E-02 | 4.85E-02 | 4.31E-02 | 3.74E-02 | 3.10E-02 | 2.48E-02 | 1.79E-02 | 1.25E-02 | 6.12E-03 |
| 3.5                                      | 1.05E-01    | 9.56E-02 | 8.49E-02 | 7.54E-02 | 6.60E-02 | 5.44E-02 | 4.37E-02 | 3.16E-02 | 2.16E-02 | 1.09E-02 |
| 4.0                                      | 1.48E-01    | 1.34E-01 | 1.19E-01 | 1.06E-01 | 9.27E-02 | 7.63E-02 | 6.13E-02 | 4.42E-02 | 3.07E-02 | 1.52E-02 |
| 4.5                                      | 1.86E-01    | 1.68E-01 | 1.50E-01 | 1.33E-01 | 1.16E-01 | 9.63E-02 | 7.69E-02 | 5.50E-02 | 3.81E-02 | 1.93E-02 |
| 5.0                                      | 2.19E-01    | 1.98E-01 | 1.76E-01 | 1.57E-01 | 1.37E-01 | 1.13E-01 | 9.02E-02 | 6.50E-02 | 4.50E-02 | 2.26E-02 |
| 5.5                                      | 2.46E-01    | 2.23E-01 | 1.98E-01 | 1.76E-01 | 1.54E-01 | 1.27E-01 | 1.01E-01 | 7.32E-02 | 5.08E-02 | 2.53E-02 |
| 6.0                                      | 2.68E-01    | 2.43E-01 | 2.16E-01 | 1.92E-01 | 1.68E-01 | 1.38E-01 | 1.11E-01 | 8.00E-02 | 5.58E-02 | 2.77E-02 |
| 6.5                                      | 2.88E-01    | 2.61E-01 | 2.32E-01 | 2.06E-01 | 1.80E-01 | 1.48E-01 | 1.19E-01 | 8.61E-02 | 5.93E-02 | 3.00E-02 |
| 7.0                                      | 3.05E-01    | 2.77E-01 | 2.45E-01 | 2.19E-01 | 1.91E-01 | 1.58E-01 | 1.27E-01 | 9.14E-02 | 6.30E-02 | 3.16E-02 |
| 7.5                                      | 3.21E-01    | 2.91E-01 | 2.59E-01 | 2.30E-01 | 2.01E-01 | 1.66E-01 | 1.34E-01 | 9.63E-02 | 6.62E-02 | 3.32E-02 |
| 8.0                                      | 3.35E-01    | 3.04E-01 | 2.70E-01 | 2.41E-01 | 2.10E-01 | 1.73E-01 | 1.39E-01 | 1.00E-01 | 6.89E-02 | 3.46E-02 |
| 8.5                                      | 3.47E-01    | 3.16E-01 | 2.81E-01 | 2.50E-01 | 2.18E-01 | 1.81E-01 | 1.44E-01 | 1.04E-01 | 7.19E-02 | 3.58E-02 |
| 9.0                                      | 3.59E-01    | 3.26E-01 | 2.90E-01 | 2.58E-01 | 2.26E-01 | 1.86E-01 | 1.49E-01 | 1.07E-01 | 7.42E-02 | 3.72E-02 |
| 9.5                                      | 3.71E-01    | 3.37E-01 | 2.99E-01 | 2.66E-01 | 2.32E-01 | 1.92E-01 | 1.54E-01 | 1.11E-01 | 7.63E-02 | 3.82E-02 |
| 10.0                                     | 3.81E-01    | 3.46E-01 | 3.07E-01 | 2.74E-01 | 2.39E-01 | 1.97E-01 | 1.58E-01 | 1.14E-01 | 7.89E-02 | 3.92E-02 |
| $\phi(\text{TAM} \leftarrow \text{TBV})$ |             |          |          |          |          |          |          |          |          |          |
| Energy<br>(MeV)                          | Cellularity |          |          |          |          |          |          |          |          |          |
|                                          | 100%        | 90%      | 80%      | 70%      | 60%      | 50%      | 40%      | 30%      | 20%      | 10%      |
| 3.0                                      | 1.02E-03    | 9.21E-04 | 8.37E-04 | 7.50E-04 | 6.38E-04 | 5.19E-04 | 4.19E-04 | 3.26E-04 | 1.96E-04 | 1.10E-04 |
| 3.5                                      | 2.65E-03    | 2.41E-03 | 2.04E-03 | 1.89E-03 | 1.67E-03 | 1.35E-03 | 1.08E-03 | 8.04E-04 | 5.39E-04 | 2.71E-04 |
| 4.0                                      | 5.32E-03    | 4.92E-03 | 4.31E-03 | 3.88E-03 | 3.31E-03 | 2.74E-03 | 2.22E-03 | 1.60E-03 | 1.10E-03 | 5.62E-04 |
| 4.5                                      | 8.95E-03    | 8.24E-03 | 7.35E-03 | 6.47E-03 | 5.71E-03 | 4.63E-03 | 3.71E-03 | 2.69E-03 | 1.88E-03 | 9.63E-04 |
| 5.0                                      | 1.37E-02    | 1.25E-02 | 1.11E-02 | 9.86E-03 | 8.64E-03 | 7.09E-03 | 5.66E-03 | 4.19E-03 | 2.84E-03 | 1.39E-03 |
| 5.5                                      | 1.95E-02    | 1.76E-02 | 1.57E-02 | 1.39E-02 | 1.21E-02 | 9.95E-03 | 8.15E-03 | 5.83E-03 | 4.02E-03 | 2.04E-03 |
| 6.0                                      | 2.58E-02    | 2.36E-02 | 2.08E-02 | 1.85E-02 | 1.63E-02 | 1.33E-02 | 1.07E-02 | 7.65E-03 | 5.30E-03 | 2.71E-03 |
| 6.5                                      | 3.31E-02    | 2.99E-02 | 2.69E-02 | 2.37E-02 | 2.07E-02 | 1.70E-02 | 1.36E-02 | 9.84E-03 | 6.79E-03 | 3.43E-03 |
| 7.0                                      | 4.10E-02    | 3.72E-02 | 3.32E-02 | 2.93E-02 | 2.56E-02 | 2.13E-02 | 1.71E-02 | 1.23E-02 | 8.46E-03 | 4.26E-03 |
| 7.5                                      | 4.97E-02    | 4.55E-02 | 4.01E-02 | 3.57E-02 | 3.11E-02 | 2.57E-02 | 2.06E-02 | 1.49E-02 | 1.03E-02 | 5.14E-03 |
| 8.0                                      | 5.89E-02    | 5.36E-02 | 4.73E-02 | 4.24E-02 | 3.70E-02 | 3.06E-02 | 2.43E-02 | 1.78E-02 | 1.22E-02 | 6.10E-03 |
| 8.5                                      | 6.93E-02    | 6.27E-02 | 5.60E-02 | 4.94E-02 | 4.34E-02 | 3.59E-02 | 2.86E-02 | 2.06E-02 | 1.44E-02 | 7.19E-03 |
| 9.0                                      | 7.99E-02    | 7.25E-02 | 6.43E-02 | 5.71E-02 | 5.00E-02 | 4.11E-02 | 3.29E-02 | 2.37E-02 | 1.65E-02 | 8.17E-03 |
| 9.5                                      | 9.06E-02    | 8.20E-02 | 7.26E-02 | 6.49E-02 | 5.70E-02 | 4.70E-02 | 3.78E-02 | 2.71E-02 | 1.87E-02 | 9.46E-03 |
| 10.0                                     | 1.02E-01    | 9.31E-02 | 8.29E-02 | 7.37E-02 | 6.42E-02 | 5.32E-02 | 4.25E-02 | 3.06E-02 | 2.10E-02 | 1.07E-02 |

**TABLE 8B**

Absorbed Fractions to Active Bone Marrow (TAM) for  $\alpha$ -Emissions Within Lumbar Vertebrae of Leeds 44-Year Male for Various Source Tissues and Marrow Cellularities

| Lumbar Vertebrae                         |             |          |          |          |          |          |          |          |          |          |
|------------------------------------------|-------------|----------|----------|----------|----------|----------|----------|----------|----------|----------|
| $\phi(\text{TAM} \leftarrow \text{TAM})$ |             |          |          |          |          |          |          |          |          |          |
| Energy (MeV)                             | Cellularity |          |          |          |          |          |          |          |          |          |
|                                          | 100%        | 90%      | 80%      | 70%      | 60%      | 50%      | 40%      | 30%      | 20%      | 10%      |
| 3.0                                      | 9.90E-01    | 9.72E-01 | 9.46E-01 | 9.19E-01 | 8.83E-01 | 8.47E-01 | 8.11E-01 | 7.65E-01 | 7.18E-01 | 6.45E-01 |
| 3.5                                      | 9.88E-01    | 9.64E-01 | 9.33E-01 | 8.99E-01 | 8.54E-01 | 8.12E-01 | 7.69E-01 | 7.13E-01 | 6.60E-01 | 5.77E-01 |
| 4.0                                      | 9.86E-01    | 9.57E-01 | 9.18E-01 | 8.78E-01 | 8.25E-01 | 7.75E-01 | 7.25E-01 | 6.62E-01 | 6.03E-01 | 5.15E-01 |
| 4.5                                      | 9.83E-01    | 9.49E-01 | 9.02E-01 | 8.55E-01 | 7.94E-01 | 7.38E-01 | 6.82E-01 | 6.13E-01 | 5.49E-01 | 4.57E-01 |
| 5.0                                      | 9.80E-01    | 9.40E-01 | 8.87E-01 | 8.34E-01 | 7.66E-01 | 7.03E-01 | 6.42E-01 | 5.67E-01 | 5.00E-01 | 4.05E-01 |
| 5.5                                      | 9.77E-01    | 9.32E-01 | 8.72E-01 | 8.13E-01 | 7.38E-01 | 6.69E-01 | 6.04E-01 | 5.25E-01 | 4.55E-01 | 3.59E-01 |
| 6.0                                      | 9.74E-01    | 9.23E-01 | 8.57E-01 | 7.93E-01 | 7.14E-01 | 6.40E-01 | 5.70E-01 | 4.87E-01 | 4.15E-01 | 3.20E-01 |
| 6.5                                      | 9.70E-01    | 9.14E-01 | 8.43E-01 | 7.75E-01 | 6.91E-01 | 6.15E-01 | 5.41E-01 | 4.55E-01 | 3.82E-01 | 2.87E-01 |
| 7.0                                      | 9.67E-01    | 9.07E-01 | 8.31E-01 | 7.59E-01 | 6.74E-01 | 5.93E-01 | 5.16E-01 | 4.27E-01 | 3.53E-01 | 2.60E-01 |
| 7.5                                      | 9.62E-01    | 8.99E-01 | 8.19E-01 | 7.45E-01 | 6.61E-01 | 5.76E-01 | 4.96E-01 | 4.05E-01 | 3.30E-01 | 2.37E-01 |
| 8.0                                      | 9.59E-01    | 8.93E-01 | 8.09E-01 | 7.34E-01 | 6.49E-01 | 5.63E-01 | 4.81E-01 | 3.87E-01 | 3.10E-01 | 2.18E-01 |
| 8.5                                      | 9.55E-01    | 8.85E-01 | 8.01E-01 | 7.25E-01 | 6.41E-01 | 5.52E-01 | 4.69E-01 | 3.74E-01 | 2.96E-01 | 2.03E-01 |
| 9.0                                      | 9.50E-01    | 8.79E-01 | 7.94E-01 | 7.18E-01 | 6.35E-01 | 5.44E-01 | 4.60E-01 | 3.63E-01 | 2.84E-01 | 1.92E-01 |
| 9.5                                      | 9.46E-01    | 8.74E-01 | 7.88E-01 | 7.13E-01 | 6.30E-01 | 5.38E-01 | 4.52E-01 | 3.54E-01 | 2.75E-01 | 1.82E-01 |
| 10.0                                     | 9.41E-01    | 8.68E-01 | 7.82E-01 | 7.08E-01 | 6.26E-01 | 5.33E-01 | 4.45E-01 | 3.47E-01 | 2.67E-01 | 1.74E-01 |
| $\phi(\text{TAM} \leftarrow \text{TBE})$ |             |          |          |          |          |          |          |          |          |          |
| Energy (MeV)                             | Cellularity |          |          |          |          |          |          |          |          |          |
|                                          | 100%        | 90%      | 80%      | 70%      | 60%      | 50%      | 40%      | 30%      | 20%      | 10%      |
| 3.0                                      | 2.62E-01    | 2.38E-01 | 2.10E-01 | 1.87E-01 | 1.64E-01 | 1.35E-01 | 1.09E-01 | 7.79E-02 | 5.42E-02 | 2.70E-02 |
| 3.5                                      | 3.01E-01    | 2.72E-01 | 2.42E-01 | 2.15E-01 | 1.88E-01 | 1.54E-01 | 1.24E-01 | 8.94E-02 | 6.14E-02 | 3.09E-02 |
| 4.0                                      | 3.30E-01    | 2.98E-01 | 2.66E-01 | 2.37E-01 | 2.06E-01 | 1.70E-01 | 1.36E-01 | 9.80E-02 | 6.80E-02 | 3.38E-02 |
| 4.5                                      | 3.52E-01    | 3.20E-01 | 2.84E-01 | 2.52E-01 | 2.21E-01 | 1.81E-01 | 1.46E-01 | 1.05E-01 | 7.24E-02 | 3.62E-02 |
| 5.0                                      | 3.72E-01    | 3.36E-01 | 2.99E-01 | 2.66E-01 | 2.32E-01 | 1.92E-01 | 1.53E-01 | 1.11E-01 | 7.60E-02 | 3.84E-02 |
| 5.5                                      | 3.87E-01    | 3.52E-01 | 3.12E-01 | 2.77E-01 | 2.42E-01 | 2.00E-01 | 1.61E-01 | 1.15E-01 | 7.99E-02 | 3.99E-02 |
| 6.0                                      | 4.00E-01    | 3.62E-01 | 3.21E-01 | 2.86E-01 | 2.50E-01 | 2.07E-01 | 1.65E-01 | 1.19E-01 | 8.22E-02 | 4.13E-02 |
| 6.5                                      | 4.12E-01    | 3.73E-01 | 3.32E-01 | 2.95E-01 | 2.57E-01 | 2.12E-01 | 1.70E-01 | 1.22E-01 | 8.45E-02 | 4.23E-02 |
| 7.0                                      | 4.21E-01    | 3.81E-01 | 3.39E-01 | 3.01E-01 | 2.63E-01 | 2.17E-01 | 1.74E-01 | 1.25E-01 | 8.63E-02 | 4.31E-02 |
| 7.5                                      | 4.29E-01    | 3.89E-01 | 3.45E-01 | 3.08E-01 | 2.69E-01 | 2.22E-01 | 1.78E-01 | 1.28E-01 | 8.84E-02 | 4.42E-02 |
| 8.0                                      | 4.39E-01    | 3.98E-01 | 3.53E-01 | 3.14E-01 | 2.74E-01 | 2.26E-01 | 1.81E-01 | 1.30E-01 | 9.01E-02 | 4.50E-02 |
| 8.5                                      | 4.45E-01    | 4.05E-01 | 3.59E-01 | 3.19E-01 | 2.78E-01 | 2.29E-01 | 1.84E-01 | 1.33E-01 | 9.16E-02 | 4.60E-02 |
| 9.0                                      | 4.53E-01    | 4.10E-01 | 3.64E-01 | 3.24E-01 | 2.83E-01 | 2.33E-01 | 1.87E-01 | 1.35E-01 | 9.29E-02 | 4.64E-02 |
| 9.5                                      | 4.60E-01    | 4.17E-01 | 3.69E-01 | 3.30E-01 | 2.86E-01 | 2.37E-01 | 1.90E-01 | 1.36E-01 | 9.42E-02 | 4.72E-02 |
| 10.0                                     | 4.66E-01    | 4.23E-01 | 3.75E-01 | 3.35E-01 | 2.92E-01 | 2.41E-01 | 1.93E-01 | 1.39E-01 | 9.56E-02 | 4.79E-02 |

TABLE 8B (Continued)

| Lumbar Vertebrae                         |             |          |          |          |          |          |          |          |          |          |
|------------------------------------------|-------------|----------|----------|----------|----------|----------|----------|----------|----------|----------|
| $\phi(\text{TAM} \leftarrow \text{TBS})$ |             |          |          |          |          |          |          |          |          |          |
| Energy<br>(MeV)                          | Cellularity |          |          |          |          |          |          |          |          |          |
|                                          | 100%        | 90%      | 80%      | 70%      | 60%      | 50%      | 40%      | 30%      | 20%      | 10%      |
| 3.0                                      | 5.91E-02    | 5.34E-02 | 4.76E-02 | 4.25E-02 | 3.70E-02 | 3.07E-02 | 2.44E-02 | 1.77E-02 | 1.21E-02 | 6.16E-03 |
| 3.5                                      | 1.05E-01    | 9.46E-02 | 8.41E-02 | 7.50E-02 | 6.52E-02 | 5.40E-02 | 4.31E-02 | 3.10E-02 | 2.15E-02 | 1.07E-02 |
| 4.0                                      | 1.46E-01    | 1.33E-01 | 1.18E-01 | 1.05E-01 | 9.18E-02 | 7.55E-02 | 6.11E-02 | 4.37E-02 | 3.04E-02 | 1.52E-02 |
| 4.5                                      | 1.84E-01    | 1.67E-01 | 1.48E-01 | 1.32E-01 | 1.15E-01 | 9.48E-02 | 7.60E-02 | 5.48E-02 | 3.83E-02 | 1.89E-02 |
| 5.0                                      | 2.16E-01    | 1.96E-01 | 1.74E-01 | 1.55E-01 | 1.35E-01 | 1.12E-01 | 8.96E-02 | 6.45E-02 | 4.45E-02 | 2.21E-02 |
| 5.5                                      | 2.42E-01    | 2.19E-01 | 1.95E-01 | 1.74E-01 | 1.52E-01 | 1.26E-01 | 1.01E-01 | 7.24E-02 | 5.02E-02 | 2.49E-02 |
| 6.0                                      | 2.63E-01    | 2.39E-01 | 2.12E-01 | 1.89E-01 | 1.65E-01 | 1.37E-01 | 1.10E-01 | 7.90E-02 | 5.42E-02 | 2.73E-02 |
| 6.5                                      | 2.82E-01    | 2.56E-01 | 2.28E-01 | 2.03E-01 | 1.77E-01 | 1.47E-01 | 1.18E-01 | 8.42E-02 | 5.84E-02 | 2.93E-02 |
| 7.0                                      | 2.99E-01    | 2.71E-01 | 2.42E-01 | 2.15E-01 | 1.88E-01 | 1.56E-01 | 1.25E-01 | 8.95E-02 | 6.24E-02 | 3.11E-02 |
| 7.5                                      | 3.16E-01    | 2.86E-01 | 2.55E-01 | 2.27E-01 | 1.98E-01 | 1.64E-01 | 1.31E-01 | 9.50E-02 | 6.55E-02 | 3.28E-02 |
| 8.0                                      | 3.30E-01    | 2.99E-01 | 2.66E-01 | 2.37E-01 | 2.07E-01 | 1.71E-01 | 1.38E-01 | 9.88E-02 | 6.80E-02 | 3.41E-02 |
| 8.5                                      | 3.42E-01    | 3.10E-01 | 2.76E-01 | 2.47E-01 | 2.15E-01 | 1.78E-01 | 1.42E-01 | 1.03E-01 | 7.09E-02 | 3.53E-02 |
| 9.0                                      | 3.54E-01    | 3.21E-01 | 2.86E-01 | 2.55E-01 | 2.22E-01 | 1.84E-01 | 1.47E-01 | 1.06E-01 | 7.31E-02 | 3.66E-02 |
| 9.5                                      | 3.66E-01    | 3.32E-01 | 2.95E-01 | 2.63E-01 | 2.30E-01 | 1.90E-01 | 1.53E-01 | 1.09E-01 | 7.56E-02 | 3.75E-02 |
| 10.0                                     | 3.76E-01    | 3.42E-01 | 3.03E-01 | 2.70E-01 | 2.36E-01 | 1.95E-01 | 1.57E-01 | 1.13E-01 | 7.79E-02 | 3.89E-02 |

  

| $\phi(\text{TAM} \leftarrow \text{TBV})$ |             |          |          |          |          |          |          |          |          |          |
|------------------------------------------|-------------|----------|----------|----------|----------|----------|----------|----------|----------|----------|
| Energy<br>(MeV)                          | Cellularity |          |          |          |          |          |          |          |          |          |
|                                          | 100%        | 90%      | 80%      | 70%      | 60%      | 50%      | 40%      | 30%      | 20%      | 10%      |
| 3.0                                      | 9.75E-04    | 8.49E-04 | 7.90E-04 | 6.99E-04 | 6.09E-04 | 5.09E-04 | 3.91E-04 | 3.10E-04 | 1.97E-04 | 1.03E-04 |
| 3.5                                      | 2.52E-03    | 2.32E-03 | 2.09E-03 | 1.85E-03 | 1.61E-03 | 1.31E-03 | 1.08E-03 | 7.68E-04 | 5.25E-04 | 2.53E-04 |
| 4.0                                      | 5.24E-03    | 4.73E-03 | 4.14E-03 | 3.72E-03 | 3.19E-03 | 2.64E-03 | 2.14E-03 | 1.57E-03 | 1.07E-03 | 5.51E-04 |
| 4.5                                      | 8.96E-03    | 8.11E-03 | 7.11E-03 | 6.34E-03 | 5.51E-03 | 4.58E-03 | 3.59E-03 | 2.62E-03 | 1.81E-03 | 9.05E-04 |
| 5.0                                      | 1.36E-02    | 1.22E-02 | 1.08E-02 | 9.58E-03 | 8.36E-03 | 7.06E-03 | 5.59E-03 | 4.00E-03 | 2.81E-03 | 1.43E-03 |
| 5.5                                      | 1.90E-02    | 1.72E-02 | 1.54E-02 | 1.35E-02 | 1.19E-02 | 9.82E-03 | 7.93E-03 | 5.71E-03 | 3.90E-03 | 1.94E-03 |
| 6.0                                      | 2.53E-02    | 2.30E-02 | 2.03E-02 | 1.81E-02 | 1.59E-02 | 1.31E-02 | 1.05E-02 | 7.55E-03 | 5.22E-03 | 2.63E-03 |
| 6.5                                      | 3.23E-02    | 2.95E-02 | 2.62E-02 | 2.35E-02 | 2.03E-02 | 1.69E-02 | 1.36E-02 | 9.64E-03 | 6.75E-03 | 3.36E-03 |
| 7.0                                      | 3.97E-02    | 3.64E-02 | 3.24E-02 | 2.88E-02 | 2.52E-02 | 2.06E-02 | 1.67E-02 | 1.20E-02 | 8.37E-03 | 4.18E-03 |
| 7.5                                      | 4.86E-02    | 4.40E-02 | 3.93E-02 | 3.48E-02 | 3.05E-02 | 2.53E-02 | 2.02E-02 | 1.46E-02 | 1.00E-02 | 5.04E-03 |
| 8.0                                      | 5.76E-02    | 5.24E-02 | 4.66E-02 | 4.16E-02 | 3.62E-02 | 2.99E-02 | 2.41E-02 | 1.72E-02 | 1.18E-02 | 6.05E-03 |
| 8.5                                      | 6.71E-02    | 6.10E-02 | 5.42E-02 | 4.83E-02 | 4.21E-02 | 3.46E-02 | 2.81E-02 | 2.02E-02 | 1.40E-02 | 7.06E-03 |
| 9.0                                      | 7.74E-02    | 7.07E-02 | 6.29E-02 | 5.61E-02 | 4.87E-02 | 4.03E-02 | 3.23E-02 | 2.33E-02 | 1.59E-02 | 8.01E-03 |
| 9.5                                      | 8.87E-02    | 8.02E-02 | 7.13E-02 | 6.39E-02 | 5.55E-02 | 4.62E-02 | 3.69E-02 | 2.66E-02 | 1.82E-02 | 9.24E-03 |
| 10.0                                     | 9.98E-02    | 9.10E-02 | 8.05E-02 | 7.17E-02 | 6.27E-02 | 5.19E-02 | 4.14E-02 | 2.99E-02 | 2.06E-02 | 1.04E-02 |

**TABLE 9B**

Absorbed Fractions to Active Bone Marrow (TAM) for  $\alpha$ -Emissions Within Parietal Bone of Leeds 44-Year Male for Various Source Tissues and Marrow Cellularities

| Energy<br>(MeV) | Parietal Bone                            |          |          |          |          |          |          |          |          |          |
|-----------------|------------------------------------------|----------|----------|----------|----------|----------|----------|----------|----------|----------|
|                 | $\phi(\text{TAM} \leftarrow \text{TAM})$ |          |          |          |          |          |          |          |          |          |
|                 | Cellularity                              |          |          |          |          |          |          |          |          |          |
|                 | 100%                                     | 90%      | 80%      | 70%      | 60%      | 50%      | 40%      | 30%      | 20%      | 10%      |
| 3.0             | 9.61E-01                                 | 9.43E-01 | 9.18E-01 | 8.92E-01 | 8.57E-01 | 8.23E-01 | 7.89E-01 | 7.44E-01 | 6.98E-01 | 6.28E-01 |
| 3.5             | 9.52E-01                                 | 9.30E-01 | 8.99E-01 | 8.67E-01 | 8.24E-01 | 7.84E-01 | 7.42E-01 | 6.89E-01 | 6.37E-01 | 5.60E-01 |
| 4.0             | 9.43E-01                                 | 9.16E-01 | 8.79E-01 | 8.41E-01 | 7.91E-01 | 7.44E-01 | 6.96E-01 | 6.37E-01 | 5.81E-01 | 4.96E-01 |
| 4.5             | 9.34E-01                                 | 9.01E-01 | 8.58E-01 | 8.14E-01 | 7.57E-01 | 7.04E-01 | 6.51E-01 | 5.86E-01 | 5.25E-01 | 4.39E-01 |
| 5.0             | 9.24E-01                                 | 8.87E-01 | 8.38E-01 | 7.88E-01 | 7.24E-01 | 6.66E-01 | 6.09E-01 | 5.39E-01 | 4.76E-01 | 3.87E-01 |
| 5.5             | 9.14E-01                                 | 8.72E-01 | 8.17E-01 | 7.63E-01 | 6.93E-01 | 6.30E-01 | 5.70E-01 | 4.96E-01 | 4.31E-01 | 3.42E-01 |
| 6.0             | 9.02E-01                                 | 8.57E-01 | 7.97E-01 | 7.39E-01 | 6.66E-01 | 5.98E-01 | 5.35E-01 | 4.58E-01 | 3.92E-01 | 3.04E-01 |
| 6.5             | 8.92E-01                                 | 8.42E-01 | 7.77E-01 | 7.15E-01 | 6.41E-01 | 5.70E-01 | 5.04E-01 | 4.24E-01 | 3.58E-01 | 2.71E-01 |
| 7.0             | 8.80E-01                                 | 8.26E-01 | 7.59E-01 | 6.95E-01 | 6.19E-01 | 5.47E-01 | 4.78E-01 | 3.97E-01 | 3.30E-01 | 2.44E-01 |
| 7.5             | 8.68E-01                                 | 8.12E-01 | 7.42E-01 | 6.77E-01 | 6.02E-01 | 5.26E-01 | 4.56E-01 | 3.74E-01 | 3.06E-01 | 2.22E-01 |
| 8.0             | 8.56E-01                                 | 7.98E-01 | 7.26E-01 | 6.61E-01 | 5.87E-01 | 5.10E-01 | 4.38E-01 | 3.55E-01 | 2.87E-01 | 2.04E-01 |
| 8.5             | 8.43E-01                                 | 7.84E-01 | 7.11E-01 | 6.48E-01 | 5.75E-01 | 4.97E-01 | 4.24E-01 | 3.40E-01 | 2.72E-01 | 1.89E-01 |
| 9.0             | 8.30E-01                                 | 7.71E-01 | 6.99E-01 | 6.35E-01 | 5.64E-01 | 4.86E-01 | 4.12E-01 | 3.27E-01 | 2.59E-01 | 1.77E-01 |
| 9.5             | 8.17E-01                                 | 7.58E-01 | 6.87E-01 | 6.24E-01 | 5.55E-01 | 4.77E-01 | 4.02E-01 | 3.18E-01 | 2.49E-01 | 1.67E-01 |
| 10.0            | 8.03E-01                                 | 7.46E-01 | 6.75E-01 | 6.14E-01 | 5.47E-01 | 4.68E-01 | 3.93E-01 | 3.08E-01 | 2.39E-01 | 1.59E-01 |
| Energy<br>(MeV) | $\phi(\text{TAM} \leftarrow \text{TBE})$ |          |          |          |          |          |          |          |          |          |
|                 | Cellularity                              |          |          |          |          |          |          |          |          |          |
|                 | 100%                                     | 90%      | 80%      | 70%      | 60%      | 50%      | 40%      | 30%      | 20%      | 10%      |
| 3.0             | 2.62E-01                                 | 2.37E-01 | 2.11E-01 | 1.88E-01 | 1.64E-01 | 1.35E-01 | 1.08E-01 | 7.77E-02 | 5.37E-02 | 2.70E-02 |
| 3.5             | 3.00E-01                                 | 2.73E-01 | 2.42E-01 | 2.15E-01 | 1.88E-01 | 1.55E-01 | 1.24E-01 | 8.94E-02 | 6.19E-02 | 3.09E-02 |
| 4.0             | 3.30E-01                                 | 2.99E-01 | 2.65E-01 | 2.36E-01 | 2.06E-01 | 1.70E-01 | 1.36E-01 | 9.82E-02 | 6.78E-02 | 3.40E-02 |
| 4.5             | 3.52E-01                                 | 3.19E-01 | 2.83E-01 | 2.52E-01 | 2.20E-01 | 1.81E-01 | 1.46E-01 | 1.05E-01 | 7.27E-02 | 3.63E-02 |
| 5.0             | 3.69E-01                                 | 3.35E-01 | 2.97E-01 | 2.64E-01 | 2.31E-01 | 1.91E-01 | 1.53E-01 | 1.10E-01 | 7.58E-02 | 3.80E-02 |
| 5.5             | 3.84E-01                                 | 3.47E-01 | 3.08E-01 | 2.75E-01 | 2.40E-01 | 1.98E-01 | 1.59E-01 | 1.14E-01 | 7.89E-02 | 3.95E-02 |
| 6.0             | 3.93E-01                                 | 3.57E-01 | 3.18E-01 | 2.82E-01 | 2.46E-01 | 2.03E-01 | 1.64E-01 | 1.18E-01 | 8.13E-02 | 4.06E-02 |
| 6.5             | 4.03E-01                                 | 3.66E-01 | 3.25E-01 | 2.89E-01 | 2.54E-01 | 2.09E-01 | 1.67E-01 | 1.21E-01 | 8.35E-02 | 4.16E-02 |
| 7.0             | 4.12E-01                                 | 3.74E-01 | 3.32E-01 | 2.95E-01 | 2.58E-01 | 2.14E-01 | 1.71E-01 | 1.23E-01 | 8.50E-02 | 4.25E-02 |
| 7.5             | 4.19E-01                                 | 3.81E-01 | 3.38E-01 | 3.01E-01 | 2.63E-01 | 2.17E-01 | 1.74E-01 | 1.25E-01 | 8.65E-02 | 4.34E-02 |
| 8.0             | 4.26E-01                                 | 3.87E-01 | 3.44E-01 | 3.06E-01 | 2.68E-01 | 2.20E-01 | 1.77E-01 | 1.27E-01 | 8.80E-02 | 4.41E-02 |
| 8.5             | 4.33E-01                                 | 3.92E-01 | 3.49E-01 | 3.12E-01 | 2.72E-01 | 2.24E-01 | 1.80E-01 | 1.29E-01 | 8.93E-02 | 4.46E-02 |
| 9.0             | 4.39E-01                                 | 3.98E-01 | 3.53E-01 | 3.16E-01 | 2.75E-01 | 2.27E-01 | 1.82E-01 | 1.31E-01 | 9.06E-02 | 4.53E-02 |
| 9.5             | 4.45E-01                                 | 4.04E-01 | 3.58E-01 | 3.20E-01 | 2.78E-01 | 2.30E-01 | 1.84E-01 | 1.32E-01 | 9.15E-02 | 4.58E-02 |
| 10.0            | 4.50E-01                                 | 4.08E-01 | 3.63E-01 | 3.24E-01 | 2.83E-01 | 2.32E-01 | 1.87E-01 | 1.34E-01 | 9.24E-02 | 4.61E-02 |

**TABLE 9B (Continued)**

| <b>Parietal Bone</b>                     |             |          |          |          |          |          |          |          |          |          |
|------------------------------------------|-------------|----------|----------|----------|----------|----------|----------|----------|----------|----------|
| $\phi(\text{TAM} \leftarrow \text{TBS})$ |             |          |          |          |          |          |          |          |          |          |
| Energy<br>(MeV)                          | Cellularity |          |          |          |          |          |          |          |          |          |
|                                          | 100%        | 90%      | 80%      | 70%      | 60%      | 50%      | 40%      | 30%      | 20%      | 10%      |
| 3.0                                      | 5.98E-02    | 5.43E-02 | 4.80E-02 | 4.28E-02 | 3.71E-02 | 3.08E-02 | 2.47E-02 | 1.78E-02 | 1.22E-02 | 6.15E-03 |
| 3.5                                      | 1.03E-01    | 9.32E-02 | 8.29E-02 | 7.40E-02 | 6.42E-02 | 5.33E-02 | 4.25E-02 | 3.06E-02 | 2.11E-02 | 1.05E-02 |
| 4.0                                      | 1.43E-01    | 1.30E-01 | 1.16E-01 | 1.03E-01 | 8.98E-02 | 7.40E-02 | 5.93E-02 | 4.26E-02 | 2.95E-02 | 1.48E-02 |
| 4.5                                      | 1.78E-01    | 1.61E-01 | 1.43E-01 | 1.27E-01 | 1.11E-01 | 9.18E-02 | 7.31E-02 | 5.33E-02 | 3.66E-02 | 1.86E-02 |
| 5.0                                      | 2.05E-01    | 1.85E-01 | 1.66E-01 | 1.47E-01 | 1.28E-01 | 1.06E-01 | 8.56E-02 | 6.16E-02 | 4.24E-02 | 2.14E-02 |
| 5.5                                      | 2.24E-01    | 2.04E-01 | 1.81E-01 | 1.62E-01 | 1.42E-01 | 1.17E-01 | 9.42E-02 | 6.75E-02 | 4.69E-02 | 2.34E-02 |
| 6.0                                      | 2.39E-01    | 2.18E-01 | 1.94E-01 | 1.73E-01 | 1.52E-01 | 1.26E-01 | 1.01E-01 | 7.30E-02 | 5.04E-02 | 2.54E-02 |
| 6.5                                      | 2.54E-01    | 2.30E-01 | 2.05E-01 | 1.83E-01 | 1.60E-01 | 1.33E-01 | 1.07E-01 | 7.68E-02 | 5.35E-02 | 2.68E-02 |
| 7.0                                      | 2.66E-01    | 2.42E-01 | 2.16E-01 | 1.93E-01 | 1.69E-01 | 1.40E-01 | 1.13E-01 | 8.09E-02 | 5.60E-02 | 2.80E-02 |
| 7.5                                      | 2.78E-01    | 2.52E-01 | 2.25E-01 | 2.00E-01 | 1.76E-01 | 1.46E-01 | 1.17E-01 | 8.49E-02 | 5.85E-02 | 2.92E-02 |
| 8.0                                      | 2.88E-01    | 2.62E-01 | 2.33E-01 | 2.08E-01 | 1.83E-01 | 1.51E-01 | 1.21E-01 | 8.77E-02 | 6.05E-02 | 3.02E-02 |
| 8.5                                      | 2.96E-01    | 2.70E-01 | 2.41E-01 | 2.15E-01 | 1.89E-01 | 1.56E-01 | 1.25E-01 | 9.05E-02 | 6.22E-02 | 3.12E-02 |
| 9.0                                      | 3.04E-01    | 2.78E-01 | 2.47E-01 | 2.22E-01 | 1.94E-01 | 1.60E-01 | 1.29E-01 | 9.28E-02 | 6.42E-02 | 3.18E-02 |
| 9.5                                      | 3.12E-01    | 2.85E-01 | 2.54E-01 | 2.28E-01 | 1.99E-01 | 1.64E-01 | 1.32E-01 | 9.50E-02 | 6.53E-02 | 3.27E-02 |
| 10.0                                     | 3.20E-01    | 2.91E-01 | 2.60E-01 | 2.33E-01 | 2.03E-01 | 1.68E-01 | 1.35E-01 | 9.74E-02 | 6.70E-02 | 3.34E-02 |
| $\phi(\text{TAM} \leftarrow \text{TBV})$ |             |          |          |          |          |          |          |          |          |          |
| Energy<br>(MeV)                          | Cellularity |          |          |          |          |          |          |          |          |          |
|                                          | 100%        | 90%      | 80%      | 70%      | 60%      | 50%      | 40%      | 30%      | 20%      | 10%      |
| 3.0                                      | 4.94E-04    | 4.54E-04 | 4.07E-04 | 3.72E-04 | 3.72E-04 | 2.48E-04 | 2.15E-04 | 1.49E-04 | 1.06E-04 | 5.40E-05 |
| 3.5                                      | 1.25E-03    | 1.16E-03 | 1.01E-03 | 9.07E-04 | 9.07E-04 | 6.52E-04 | 5.25E-04 | 3.55E-04 | 2.61E-04 | 1.48E-04 |
| 4.0                                      | 2.49E-03    | 2.25E-03 | 2.00E-03 | 1.82E-03 | 1.82E-03 | 1.26E-03 | 1.04E-03 | 7.62E-04 | 5.07E-04 | 2.40E-04 |
| 4.5                                      | 4.30E-03    | 3.82E-03 | 3.48E-03 | 3.04E-03 | 3.04E-03 | 2.16E-03 | 1.72E-03 | 1.29E-03 | 8.34E-04 | 4.29E-04 |
| 5.0                                      | 6.37E-03    | 5.78E-03 | 5.07E-03 | 4.61E-03 | 4.61E-03 | 3.33E-03 | 2.64E-03 | 1.91E-03 | 1.30E-03 | 6.57E-04 |
| 5.5                                      | 8.87E-03    | 8.01E-03 | 7.25E-03 | 6.33E-03 | 6.33E-03 | 4.63E-03 | 3.74E-03 | 2.64E-03 | 1.78E-03 | 9.01E-04 |
| 6.0                                      | 1.18E-02    | 1.07E-02 | 9.38E-03 | 8.55E-03 | 8.55E-03 | 6.16E-03 | 4.87E-03 | 3.52E-03 | 2.39E-03 | 1.26E-03 |
| 6.5                                      | 1.48E-02    | 1.35E-02 | 1.21E-02 | 1.07E-02 | 1.07E-02 | 7.66E-03 | 6.24E-03 | 4.52E-03 | 3.03E-03 | 1.56E-03 |
| 7.0                                      | 1.83E-02    | 1.67E-02 | 1.49E-02 | 1.33E-02 | 1.33E-02 | 9.59E-03 | 7.67E-03 | 5.55E-03 | 3.81E-03 | 1.90E-03 |
| 7.5                                      | 2.19E-02    | 1.98E-02 | 1.77E-02 | 1.59E-02 | 1.59E-02 | 1.15E-02 | 9.20E-03 | 6.65E-03 | 4.64E-03 | 2.35E-03 |
| 8.0                                      | 2.58E-02    | 2.37E-02 | 2.11E-02 | 1.89E-02 | 1.89E-02 | 1.37E-02 | 1.09E-02 | 7.83E-03 | 5.46E-03 | 2.74E-03 |
| 8.5                                      | 3.02E-02    | 2.75E-02 | 2.47E-02 | 2.19E-02 | 2.19E-02 | 1.57E-02 | 1.26E-02 | 9.31E-03 | 6.36E-03 | 3.19E-03 |
| 9.0                                      | 3.47E-02    | 3.16E-02 | 2.80E-02 | 2.51E-02 | 2.51E-02 | 1.82E-02 | 1.45E-02 | 1.05E-02 | 7.26E-03 | 3.62E-03 |
| 9.5                                      | 3.94E-02    | 3.57E-02 | 3.17E-02 | 2.87E-02 | 2.87E-02 | 2.07E-02 | 1.67E-02 | 1.19E-02 | 8.23E-03 | 4.04E-03 |
| 10.0                                     | 4.43E-02    | 4.03E-02 | 3.57E-02 | 3.20E-02 | 3.20E-02 | 2.33E-02 | 1.87E-02 | 1.35E-02 | 9.37E-03 | 4.65E-03 |

**TABLE 10B**

Absorbed Fractions to Active Bone Marrow (TAM) for  $\alpha$ -Emissions Within Ribs of Leeds 44-Year Male for Various Source Tissues and Marrow Cellularities

| Energy (MeV) | Ribs                                     |          |          |          |          |          |          |          |          |          |
|--------------|------------------------------------------|----------|----------|----------|----------|----------|----------|----------|----------|----------|
|              | $\phi(\text{TAM} \leftarrow \text{TAM})$ |          |          |          |          |          |          |          |          |          |
|              | Cellularity                              |          |          |          |          |          |          |          |          |          |
|              | 100%                                     | 90%      | 80%      | 70%      | 60%      | 50%      | 40%      | 30%      | 20%      | 10%      |
| 3.0          | 9.93E-01                                 | 9.74E-01 | 9.49E-01 | 9.22E-01 | 8.85E-01 | 8.50E-01 | 8.13E-01 | 7.66E-01 | 7.20E-01 | 6.46E-01 |
| 3.5          | 9.91E-01                                 | 9.68E-01 | 9.36E-01 | 9.02E-01 | 8.57E-01 | 8.14E-01 | 7.71E-01 | 7.15E-01 | 6.61E-01 | 5.79E-01 |
| 4.0          | 9.90E-01                                 | 9.61E-01 | 9.22E-01 | 8.81E-01 | 8.28E-01 | 7.78E-01 | 7.27E-01 | 6.65E-01 | 6.06E-01 | 5.16E-01 |
| 4.5          | 9.88E-01                                 | 9.53E-01 | 9.07E-01 | 8.59E-01 | 7.99E-01 | 7.42E-01 | 6.85E-01 | 6.16E-01 | 5.52E-01 | 4.58E-01 |
| 5.0          | 9.86E-01                                 | 9.46E-01 | 8.93E-01 | 8.38E-01 | 7.70E-01 | 7.07E-01 | 6.45E-01 | 5.70E-01 | 5.02E-01 | 4.07E-01 |
| 5.5          | 9.84E-01                                 | 9.38E-01 | 8.78E-01 | 8.18E-01 | 7.43E-01 | 6.74E-01 | 6.07E-01 | 5.27E-01 | 4.58E-01 | 3.61E-01 |
| 6.0          | 9.81E-01                                 | 9.30E-01 | 8.63E-01 | 7.98E-01 | 7.18E-01 | 6.45E-01 | 5.74E-01 | 4.90E-01 | 4.18E-01 | 3.23E-01 |
| 6.5          | 9.79E-01                                 | 9.23E-01 | 8.50E-01 | 7.81E-01 | 6.97E-01 | 6.19E-01 | 5.45E-01 | 4.58E-01 | 3.84E-01 | 2.89E-01 |
| 7.0          | 9.76E-01                                 | 9.15E-01 | 8.38E-01 | 7.65E-01 | 6.80E-01 | 5.98E-01 | 5.21E-01 | 4.31E-01 | 3.55E-01 | 2.61E-01 |
| 7.5          | 9.73E-01                                 | 9.09E-01 | 8.28E-01 | 7.53E-01 | 6.67E-01 | 5.81E-01 | 5.00E-01 | 4.09E-01 | 3.32E-01 | 2.38E-01 |
| 8.0          | 9.71E-01                                 | 9.03E-01 | 8.19E-01 | 7.43E-01 | 6.56E-01 | 5.68E-01 | 4.86E-01 | 3.91E-01 | 3.13E-01 | 2.20E-01 |
| 8.5          | 9.68E-01                                 | 8.98E-01 | 8.12E-01 | 7.35E-01 | 6.49E-01 | 5.59E-01 | 4.74E-01 | 3.77E-01 | 2.99E-01 | 2.05E-01 |
| 9.0          | 9.65E-01                                 | 8.92E-01 | 8.05E-01 | 7.28E-01 | 6.43E-01 | 5.51E-01 | 4.66E-01 | 3.67E-01 | 2.87E-01 | 1.93E-01 |
| 9.5          | 9.62E-01                                 | 8.87E-01 | 8.00E-01 | 7.23E-01 | 6.39E-01 | 5.45E-01 | 4.58E-01 | 3.59E-01 | 2.78E-01 | 1.84E-01 |
| 10.0         | 9.58E-01                                 | 8.84E-01 | 7.95E-01 | 7.19E-01 | 6.35E-01 | 5.40E-01 | 4.52E-01 | 3.51E-01 | 2.70E-01 | 1.76E-01 |
|              | $\phi(\text{TAM} \leftarrow \text{TBE})$ |          |          |          |          |          |          |          |          |          |
|              | Cellularity                              |          |          |          |          |          |          |          |          |          |
|              | 100%                                     | 90%      | 80%      | 70%      | 60%      | 50%      | 40%      | 30%      | 20%      | 10%      |
| 3.0          | 2.62E-01                                 | 2.37E-01 | 2.11E-01 | 1.88E-01 | 1.64E-01 | 1.35E-01 | 1.08E-01 | 7.78E-02 | 5.39E-02 | 2.73E-02 |
| 3.5          | 3.01E-01                                 | 2.72E-01 | 2.41E-01 | 2.15E-01 | 1.88E-01 | 1.55E-01 | 1.25E-01 | 8.94E-02 | 6.18E-02 | 3.10E-02 |
| 4.0          | 3.30E-01                                 | 2.98E-01 | 2.65E-01 | 2.37E-01 | 2.06E-01 | 1.70E-01 | 1.36E-01 | 9.84E-02 | 6.78E-02 | 3.39E-02 |
| 4.5          | 3.53E-01                                 | 3.19E-01 | 2.84E-01 | 2.53E-01 | 2.20E-01 | 1.82E-01 | 1.47E-01 | 1.05E-01 | 7.26E-02 | 3.63E-02 |
| 5.0          | 3.72E-01                                 | 3.36E-01 | 2.99E-01 | 2.66E-01 | 2.32E-01 | 1.92E-01 | 1.54E-01 | 1.11E-01 | 7.65E-02 | 3.85E-02 |
| 5.5          | 3.88E-01                                 | 3.52E-01 | 3.12E-01 | 2.79E-01 | 2.43E-01 | 2.00E-01 | 1.60E-01 | 1.16E-01 | 8.03E-02 | 4.02E-02 |
| 6.0          | 4.01E-01                                 | 3.64E-01 | 3.23E-01 | 2.88E-01 | 2.51E-01 | 2.07E-01 | 1.66E-01 | 1.19E-01 | 8.25E-02 | 4.13E-02 |
| 6.5          | 4.12E-01                                 | 3.74E-01 | 3.32E-01 | 2.96E-01 | 2.58E-01 | 2.13E-01 | 1.71E-01 | 1.23E-01 | 8.49E-02 | 4.25E-02 |
| 7.0          | 4.23E-01                                 | 3.84E-01 | 3.41E-01 | 3.02E-01 | 2.64E-01 | 2.18E-01 | 1.75E-01 | 1.26E-01 | 8.64E-02 | 4.36E-02 |
| 7.5          | 4.34E-01                                 | 3.93E-01 | 3.49E-01 | 3.10E-01 | 2.70E-01 | 2.23E-01 | 1.80E-01 | 1.29E-01 | 8.90E-02 | 4.45E-02 |
| 8.0          | 4.43E-01                                 | 4.02E-01 | 3.56E-01 | 3.17E-01 | 2.77E-01 | 2.28E-01 | 1.83E-01 | 1.32E-01 | 9.10E-02 | 4.56E-02 |
| 8.5          | 4.52E-01                                 | 4.10E-01 | 3.63E-01 | 3.24E-01 | 2.83E-01 | 2.32E-01 | 1.87E-01 | 1.34E-01 | 9.29E-02 | 4.65E-02 |
| 9.0          | 4.61E-01                                 | 4.18E-01 | 3.71E-01 | 3.31E-01 | 2.88E-01 | 2.37E-01 | 1.90E-01 | 1.37E-01 | 9.48E-02 | 4.73E-02 |
| 9.5          | 4.69E-01                                 | 4.24E-01 | 3.78E-01 | 3.35E-01 | 2.93E-01 | 2.42E-01 | 1.93E-01 | 1.39E-01 | 9.61E-02 | 4.82E-02 |
| 10.0         | 4.77E-01                                 | 4.32E-01 | 3.84E-01 | 3.42E-01 | 2.98E-01 | 2.45E-01 | 1.96E-01 | 1.41E-01 | 9.77E-02 | 4.90E-02 |



**TABLE 10B (Continued)**

| Energy<br>(MeV) | Ribs                                     |          |          |          |          |          |          |          |          |          |
|-----------------|------------------------------------------|----------|----------|----------|----------|----------|----------|----------|----------|----------|
|                 | $\phi(\text{TAM} \leftarrow \text{TBS})$ |          |          |          |          |          |          |          |          |          |
|                 | Cellularity                              |          |          |          |          |          |          |          |          |          |
|                 | 100%                                     | 90%      | 80%      | 70%      | 60%      | 50%      | 40%      | 30%      | 20%      | 10%      |
| 3.0             | 5.83E-02                                 | 5.27E-02 | 4.70E-02 | 4.20E-02 | 3.65E-02 | 2.99E-02 | 2.42E-02 | 1.74E-02 | 1.19E-02 | 6.00E-03 |
| 3.5             | 1.03E-01                                 | 9.35E-02 | 8.32E-02 | 7.40E-02 | 6.48E-02 | 5.34E-02 | 4.29E-02 | 3.09E-02 | 2.12E-02 | 1.06E-02 |
| 4.0             | 1.46E-01                                 | 1.32E-01 | 1.18E-01 | 1.04E-01 | 9.13E-02 | 7.56E-02 | 6.03E-02 | 4.34E-02 | 2.98E-02 | 1.51E-02 |
| 4.5             | 1.84E-01                                 | 1.66E-01 | 1.48E-01 | 1.32E-01 | 1.14E-01 | 9.48E-02 | 7.59E-02 | 5.46E-02 | 3.76E-02 | 1.89E-02 |
| 5.0             | 2.16E-01                                 | 1.96E-01 | 1.74E-01 | 1.54E-01 | 1.35E-01 | 1.11E-01 | 8.96E-02 | 6.43E-02 | 4.45E-02 | 2.24E-02 |
| 5.5             | 2.42E-01                                 | 2.20E-01 | 1.95E-01 | 1.74E-01 | 1.52E-01 | 1.26E-01 | 1.01E-01 | 7.22E-02 | 5.02E-02 | 2.52E-02 |
| 6.0             | 2.64E-01                                 | 2.40E-01 | 2.13E-01 | 1.90E-01 | 1.66E-01 | 1.37E-01 | 1.10E-01 | 7.93E-02 | 5.48E-02 | 2.75E-02 |
| 6.5             | 2.83E-01                                 | 2.57E-01 | 2.29E-01 | 2.04E-01 | 1.78E-01 | 1.47E-01 | 1.18E-01 | 8.51E-02 | 5.89E-02 | 2.94E-02 |
| 7.0             | 3.02E-01                                 | 2.74E-01 | 2.44E-01 | 2.17E-01 | 1.90E-01 | 1.57E-01 | 1.25E-01 | 9.08E-02 | 6.26E-02 | 3.13E-02 |
| 7.5             | 3.20E-01                                 | 2.90E-01 | 2.58E-01 | 2.30E-01 | 2.01E-01 | 1.65E-01 | 1.33E-01 | 9.63E-02 | 6.60E-02 | 3.31E-02 |
| 8.0             | 3.36E-01                                 | 3.05E-01 | 2.71E-01 | 2.42E-01 | 2.11E-01 | 1.74E-01 | 1.40E-01 | 1.01E-01 | 6.95E-02 | 3.49E-02 |
| 8.5             | 3.50E-01                                 | 3.17E-01 | 2.82E-01 | 2.51E-01 | 2.20E-01 | 1.82E-01 | 1.45E-01 | 1.05E-01 | 7.22E-02 | 3.63E-02 |
| 9.0             | 3.64E-01                                 | 3.29E-01 | 2.94E-01 | 2.61E-01 | 2.28E-01 | 1.89E-01 | 1.51E-01 | 1.09E-01 | 7.52E-02 | 3.77E-02 |
| 9.5             | 3.75E-01                                 | 3.42E-01 | 3.03E-01 | 2.71E-01 | 2.36E-01 | 1.95E-01 | 1.56E-01 | 1.13E-01 | 7.77E-02 | 3.88E-02 |
| 10.0            | 3.88E-01                                 | 3.52E-01 | 3.13E-01 | 2.79E-01 | 2.43E-01 | 2.01E-01 | 1.61E-01 | 1.16E-01 | 8.00E-02 | 4.01E-02 |
| Energy<br>(MeV) | $\phi(\text{TAM} \leftarrow \text{TBV})$ |          |          |          |          |          |          |          |          |          |
|                 | Cellularity                              |          |          |          |          |          |          |          |          |          |
|                 | 100%                                     | 90%      | 80%      | 70%      | 60%      | 50%      | 40%      | 30%      | 20%      | 10%      |
| 3.0             | 8.84E-04                                 | 7.99E-04 | 7.15E-04 | 6.46E-04 | 5.49E-04 | 4.46E-04 | 3.63E-04 | 2.74E-04 | 1.71E-04 | 8.50E-05 |
| 3.5             | 2.35E-03                                 | 2.13E-03 | 1.88E-03 | 1.68E-03 | 1.44E-03 | 1.23E-03 | 9.81E-04 | 7.11E-04 | 4.98E-04 | 2.50E-04 |
| 4.0             | 4.79E-03                                 | 4.33E-03 | 3.88E-03 | 3.50E-03 | 3.01E-03 | 2.44E-03 | 2.00E-03 | 1.44E-03 | 9.89E-04 | 4.80E-04 |
| 4.5             | 8.02E-03                                 | 7.48E-03 | 6.57E-03 | 5.89E-03 | 5.11E-03 | 4.25E-03 | 3.39E-03 | 2.41E-03 | 1.75E-03 | 8.55E-04 |
| 5.0             | 1.26E-02                                 | 1.15E-02 | 9.95E-03 | 9.03E-03 | 7.83E-03 | 6.47E-03 | 5.12E-03 | 3.78E-03 | 2.60E-03 | 1.31E-03 |
| 5.5             | 1.75E-02                                 | 1.59E-02 | 1.41E-02 | 1.26E-02 | 1.09E-02 | 9.05E-03 | 7.29E-03 | 5.22E-03 | 3.57E-03 | 1.80E-03 |
| 6.0             | 2.34E-02                                 | 2.12E-02 | 1.90E-02 | 1.69E-02 | 1.47E-02 | 1.21E-02 | 9.79E-03 | 7.01E-03 | 4.75E-03 | 2.42E-03 |
| 6.5             | 2.97E-02                                 | 2.71E-02 | 2.42E-02 | 2.15E-02 | 1.87E-02 | 1.55E-02 | 1.25E-02 | 8.90E-03 | 6.19E-03 | 3.11E-03 |
| 7.0             | 3.69E-02                                 | 3.35E-02 | 2.99E-02 | 2.65E-02 | 2.33E-02 | 1.92E-02 | 1.54E-02 | 1.11E-02 | 7.65E-03 | 3.77E-03 |
| 7.5             | 4.47E-02                                 | 4.08E-02 | 3.61E-02 | 3.21E-02 | 2.80E-02 | 2.32E-02 | 1.87E-02 | 1.34E-02 | 9.19E-03 | 4.69E-03 |
| 8.0             | 5.29E-02                                 | 4.83E-02 | 4.29E-02 | 3.79E-02 | 3.32E-02 | 2.76E-02 | 2.19E-02 | 1.59E-02 | 1.10E-02 | 5.43E-03 |
| 8.5             | 6.15E-02                                 | 5.59E-02 | 4.97E-02 | 4.44E-02 | 3.87E-02 | 3.19E-02 | 2.58E-02 | 1.85E-02 | 1.29E-02 | 6.40E-03 |
| 9.0             | 7.08E-02                                 | 6.43E-02 | 5.72E-02 | 5.09E-02 | 4.44E-02 | 3.68E-02 | 2.93E-02 | 2.12E-02 | 1.46E-02 | 7.43E-03 |
| 9.5             | 8.03E-02                                 | 7.31E-02 | 6.49E-02 | 5.80E-02 | 5.04E-02 | 4.17E-02 | 3.35E-02 | 2.42E-02 | 1.66E-02 | 8.38E-03 |
| 10.0            | 9.07E-02                                 | 8.22E-02 | 7.33E-02 | 6.53E-02 | 5.72E-02 | 4.71E-02 | 3.77E-02 | 2.71E-02 | 1.88E-02 | 9.46E-03 |

**TABLE 11B**

Absorbed Fractions to TBE from  $\alpha$ -Emissions Within TAM of Leeds 44-Year Male  
Within Various Skeletal Sites and as Function of Marrow Cellularity

| $\phi(\text{TBE} \leftarrow \text{TAM})$ |             |          |          |          |          |          |          |          |          |          |
|------------------------------------------|-------------|----------|----------|----------|----------|----------|----------|----------|----------|----------|
| <b>Cervical Vertebrae</b>                |             |          |          |          |          |          |          |          |          |          |
| Energy<br>(MeV)                          | Cellularity |          |          |          |          |          |          |          |          |          |
|                                          | 100%        | 90%      | 80%      | 70%      | 60%      | 50%      | 40%      | 30%      | 20%      | 10%      |
| 3.0                                      | 1.29E-02    | 1.29E-02 | 1.25E-02 | 1.23E-02 | 1.21E-02 | 1.19E-02 | 1.15E-02 | 1.11E-02 | 1.07E-02 | 1.01E-02 |
| 3.5                                      | 1.53E-02    | 1.49E-02 | 1.49E-02 | 1.47E-02 | 1.41E-02 | 1.35E-02 | 1.30E-02 | 1.24E-02 | 1.19E-02 | 1.09E-02 |
| 4.0                                      | 1.74E-02    | 1.71E-02 | 1.68E-02 | 1.61E-02 | 1.53E-02 | 1.49E-02 | 1.43E-02 | 1.33E-02 | 1.27E-02 | 1.15E-02 |
| 4.5                                      | 1.90E-02    | 1.87E-02 | 1.81E-02 | 1.73E-02 | 1.67E-02 | 1.59E-02 | 1.49E-02 | 1.38E-02 | 1.31E-02 | 1.15E-02 |
| 5.0                                      | 2.06E-02    | 2.00E-02 | 1.92E-02 | 1.82E-02 | 1.71E-02 | 1.63E-02 | 1.53E-02 | 1.41E-02 | 1.29E-02 | 1.14E-02 |
| 5.5                                      | 2.20E-02    | 2.11E-02 | 2.02E-02 | 1.91E-02 | 1.77E-02 | 1.66E-02 | 1.54E-02 | 1.42E-02 | 1.27E-02 | 1.09E-02 |
| 6.0                                      | 2.32E-02    | 2.23E-02 | 2.11E-02 | 1.97E-02 | 1.80E-02 | 1.70E-02 | 1.55E-02 | 1.36E-02 | 1.24E-02 | 1.04E-02 |
| 6.5                                      | 2.44E-02    | 2.31E-02 | 2.19E-02 | 2.01E-02 | 1.84E-02 | 1.69E-02 | 1.55E-02 | 1.36E-02 | 1.20E-02 | 1.00E-02 |
| 7.0                                      | 2.57E-02    | 2.44E-02 | 2.25E-02 | 2.10E-02 | 1.89E-02 | 1.68E-02 | 1.51E-02 | 1.32E-02 | 1.17E-02 | 9.36E-03 |
| 7.5                                      | 2.71E-02    | 2.54E-02 | 2.34E-02 | 2.12E-02 | 1.87E-02 | 1.68E-02 | 1.51E-02 | 1.29E-02 | 1.13E-02 | 8.94E-03 |
| 8.0                                      | 2.84E-02    | 2.63E-02 | 2.40E-02 | 2.15E-02 | 1.89E-02 | 1.68E-02 | 1.49E-02 | 1.25E-02 | 1.08E-02 | 8.55E-03 |
| 8.5                                      | 2.93E-02    | 2.73E-02 | 2.44E-02 | 2.17E-02 | 1.87E-02 | 1.65E-02 | 1.43E-02 | 1.21E-02 | 1.03E-02 | 8.09E-03 |
| 9.0                                      | 3.05E-02    | 2.80E-02 | 2.48E-02 | 2.19E-02 | 1.88E-02 | 1.61E-02 | 1.41E-02 | 1.17E-02 | 9.99E-03 | 7.67E-03 |
| 9.5                                      | 3.14E-02    | 2.87E-02 | 2.51E-02 | 2.20E-02 | 1.83E-02 | 1.58E-02 | 1.35E-02 | 1.13E-02 | 9.51E-03 | 7.44E-03 |
| 10.0                                     | 3.22E-02    | 2.92E-02 | 2.53E-02 | 2.17E-02 | 1.83E-02 | 1.55E-02 | 1.33E-02 | 1.09E-02 | 9.14E-03 | 7.19E-03 |
| <b>Femur Head</b>                        |             |          |          |          |          |          |          |          |          |          |
| Energy<br>(MeV)                          | Cellularity |          |          |          |          |          |          |          |          |          |
|                                          | 100%        | 90%      | 80%      | 70%      | 60%      | 50%      | 40%      | 30%      | 20%      | 10%      |
| 3.0                                      | 9.08E-03    | 8.99E-03 | 8.93E-03 | 8.64E-03 | 8.57E-03 | 8.35E-03 | 8.04E-03 | 7.83E-03 | 7.36E-03 | 6.90E-03 |
| 3.5                                      | 1.11E-02    | 1.07E-02 | 1.05E-02 | 1.02E-02 | 1.00E-02 | 9.68E-03 | 9.28E-03 | 8.77E-03 | 8.43E-03 | 7.74E-03 |
| 4.0                                      | 1.26E-02    | 1.23E-02 | 1.19E-02 | 1.16E-02 | 1.12E-02 | 1.07E-02 | 1.02E-02 | 9.71E-03 | 9.13E-03 | 8.14E-03 |
| 4.5                                      | 1.40E-02    | 1.37E-02 | 1.32E-02 | 1.27E-02 | 1.22E-02 | 1.17E-02 | 1.09E-02 | 1.04E-02 | 9.46E-03 | 8.35E-03 |
| 5.0                                      | 1.54E-02    | 1.50E-02 | 1.43E-02 | 1.35E-02 | 1.27E-02 | 1.22E-02 | 1.13E-02 | 1.03E-02 | 9.58E-03 | 8.25E-03 |
| 5.5                                      | 1.64E-02    | 1.59E-02 | 1.50E-02 | 1.43E-02 | 1.33E-02 | 1.26E-02 | 1.14E-02 | 1.05E-02 | 9.48E-03 | 7.96E-03 |
| 6.0                                      | 1.78E-02    | 1.68E-02 | 1.59E-02 | 1.51E-02 | 1.38E-02 | 1.27E-02 | 1.17E-02 | 1.04E-02 | 9.24E-03 | 7.76E-03 |
| 6.5                                      | 1.88E-02    | 1.79E-02 | 1.66E-02 | 1.56E-02 | 1.40E-02 | 1.27E-02 | 1.16E-02 | 1.03E-02 | 9.18E-03 | 7.48E-03 |
| 7.0                                      | 1.97E-02    | 1.87E-02 | 1.73E-02 | 1.58E-02 | 1.42E-02 | 1.29E-02 | 1.17E-02 | 1.00E-02 | 8.72E-03 | 6.98E-03 |
| 7.5                                      | 2.07E-02    | 1.96E-02 | 1.79E-02 | 1.64E-02 | 1.44E-02 | 1.27E-02 | 1.13E-02 | 9.80E-03 | 8.44E-03 | 6.64E-03 |
| 8.0                                      | 2.20E-02    | 2.02E-02 | 1.85E-02 | 1.65E-02 | 1.43E-02 | 1.26E-02 | 1.10E-02 | 9.56E-03 | 8.05E-03 | 6.33E-03 |
| 8.5                                      | 2.27E-02    | 2.09E-02 | 1.89E-02 | 1.66E-02 | 1.43E-02 | 1.25E-02 | 1.08E-02 | 9.12E-03 | 7.78E-03 | 6.01E-03 |
| 9.0                                      | 2.35E-02    | 2.16E-02 | 1.92E-02 | 1.68E-02 | 1.44E-02 | 1.22E-02 | 1.05E-02 | 8.84E-03 | 7.37E-03 | 5.71E-03 |
| 9.5                                      | 2.45E-02    | 2.22E-02 | 1.93E-02 | 1.68E-02 | 1.43E-02 | 1.22E-02 | 1.02E-02 | 8.42E-03 | 7.18E-03 | 5.44E-03 |
| 10.0                                     | 2.51E-02    | 2.27E-02 | 1.94E-02 | 1.70E-02 | 1.39E-02 | 1.19E-02 | 1.00E-02 | 8.16E-03 | 6.85E-03 | 5.17E-03 |
| <b>Femur Neck</b>                        |             |          |          |          |          |          |          |          |          |          |
| Energy<br>(MeV)                          | Cellularity |          |          |          |          |          |          |          |          |          |
|                                          | 100%        | 90%      | 80%      | 70%      | 60%      | 50%      | 40%      | 30%      | 20%      | 10%      |
| 3.0                                      | 6.51E-03    | 6.44E-03 | 6.23E-03 | 6.13E-03 | 6.12E-03 | 5.83E-03 | 5.75E-03 | 5.67E-03 | 5.29E-03 | 4.84E-03 |
| 3.5                                      | 7.67E-03    | 7.55E-03 | 7.36E-03 | 7.17E-03 | 7.01E-03 | 6.79E-03 | 6.65E-03 | 6.27E-03 | 6.03E-03 | 5.53E-03 |
| 4.0                                      | 8.80E-03    | 8.66E-03 | 8.48E-03 | 8.22E-03 | 7.88E-03 | 7.37E-03 | 7.25E-03 | 6.74E-03 | 6.38E-03 | 5.72E-03 |
| 4.5                                      | 9.80E-03    | 9.57E-03 | 9.27E-03 | 8.87E-03 | 8.61E-03 | 8.14E-03 | 7.66E-03 | 7.15E-03 | 6.68E-03 | 5.91E-03 |
| 5.0                                      | 1.08E-02    | 1.04E-02 | 1.00E-02 | 9.62E-03 | 8.89E-03 | 8.49E-03 | 8.00E-03 | 7.35E-03 | 6.57E-03 | 5.82E-03 |
| 5.5                                      | 1.15E-02    | 1.11E-02 | 1.04E-02 | 1.00E-02 | 9.27E-03 | 8.63E-03 | 8.00E-03 | 7.36E-03 | 6.60E-03 | 5.66E-03 |
| 6.0                                      | 1.21E-02    | 1.17E-02 | 1.11E-02 | 1.04E-02 | 9.49E-03 | 8.76E-03 | 8.11E-03 | 7.26E-03 | 6.51E-03 | 5.32E-03 |
| 6.5                                      | 1.30E-02    | 1.24E-02 | 1.15E-02 | 1.07E-02 | 9.69E-03 | 8.99E-03 | 8.04E-03 | 7.13E-03 | 6.33E-03 | 5.15E-03 |
| 7.0                                      | 1.37E-02    | 1.29E-02 | 1.20E-02 | 1.11E-02 | 9.86E-03 | 9.02E-03 | 7.99E-03 | 7.09E-03 | 6.19E-03 | 4.91E-03 |
| 7.5                                      | 1.45E-02    | 1.36E-02 | 1.25E-02 | 1.14E-02 | 1.00E-02 | 8.88E-03 | 7.87E-03 | 6.71E-03 | 5.96E-03 | 4.81E-03 |
| 8.0                                      | 1.53E-02    | 1.41E-02 | 1.28E-02 | 1.16E-02 | 1.01E-02 | 8.89E-03 | 7.96E-03 | 6.64E-03 | 5.62E-03 | 4.45E-03 |
| 8.5                                      | 1.58E-02    | 1.46E-02 | 1.33E-02 | 1.17E-02 | 1.02E-02 | 8.77E-03 | 7.72E-03 | 6.59E-03 | 5.52E-03 | 4.30E-03 |
| 9.0                                      | 1.63E-02    | 1.53E-02 | 1.35E-02 | 1.18E-02 | 9.97E-03 | 8.82E-03 | 7.59E-03 | 6.35E-03 | 5.30E-03 | 4.21E-03 |
| 9.5                                      | 1.71E-02    | 1.56E-02 | 1.37E-02 | 1.21E-02 | 1.00E-02 | 8.65E-03 | 7.47E-03 | 6.17E-03 | 5.13E-03 | 4.02E-03 |
| 10.0                                     | 1.77E-02    | 1.60E-02 | 1.38E-02 | 1.21E-02 | 9.99E-03 | 8.54E-03 | 7.23E-03 | 5.94E-03 | 5.04E-03 | 3.90E-03 |

**TABLE 11B (Continued)**

| $\phi(\text{TBE} \leftarrow \text{TAM})$ |             |          |          |          |          |          |          |          |          |          |
|------------------------------------------|-------------|----------|----------|----------|----------|----------|----------|----------|----------|----------|
| <b>Iliac Crest</b>                       |             |          |          |          |          |          |          |          |          |          |
| Energy<br>(MeV)                          | Cellularity |          |          |          |          |          |          |          |          |          |
|                                          | 100%        | 90%      | 80%      | 70%      | 60%      | 50%      | 40%      | 30%      | 20%      | 10%      |
| 3.0                                      | 1.23E-02    | 1.21E-02 | 1.18E-02 | 1.17E-02 | 1.14E-02 | 1.11E-02 | 1.09E-02 | 1.06E-02 | 1.01E-02 | 9.33E-03 |
| 3.5                                      | 1.47E-02    | 1.45E-02 | 1.41E-02 | 1.39E-02 | 1.33E-02 | 1.30E-02 | 1.27E-02 | 1.18E-02 | 1.14E-02 | 1.04E-02 |
| 4.0                                      | 1.68E-02    | 1.65E-02 | 1.59E-02 | 1.56E-02 | 1.51E-02 | 1.43E-02 | 1.38E-02 | 1.29E-02 | 1.23E-02 | 1.09E-02 |
| 4.5                                      | 1.86E-02    | 1.84E-02 | 1.76E-02 | 1.70E-02 | 1.62E-02 | 1.53E-02 | 1.47E-02 | 1.37E-02 | 1.27E-02 | 1.11E-02 |
| 5.0                                      | 2.02E-02    | 1.98E-02 | 1.90E-02 | 1.80E-02 | 1.70E-02 | 1.59E-02 | 1.50E-02 | 1.38E-02 | 1.26E-02 | 1.11E-02 |
| 5.5                                      | 2.18E-02    | 2.11E-02 | 2.00E-02 | 1.89E-02 | 1.78E-02 | 1.65E-02 | 1.53E-02 | 1.38E-02 | 1.26E-02 | 1.08E-02 |
| 6.0                                      | 2.33E-02    | 2.24E-02 | 2.11E-02 | 2.00E-02 | 1.82E-02 | 1.68E-02 | 1.55E-02 | 1.39E-02 | 1.24E-02 | 1.03E-02 |
| 6.5                                      | 2.49E-02    | 2.38E-02 | 2.22E-02 | 2.05E-02 | 1.87E-02 | 1.72E-02 | 1.55E-02 | 1.37E-02 | 1.21E-02 | 9.80E-03 |
| 7.0                                      | 2.64E-02    | 2.48E-02 | 2.30E-02 | 2.11E-02 | 1.89E-02 | 1.72E-02 | 1.54E-02 | 1.34E-02 | 1.18E-02 | 9.48E-03 |
| 7.5                                      | 2.76E-02    | 2.62E-02 | 2.38E-02 | 2.19E-02 | 1.92E-02 | 1.69E-02 | 1.52E-02 | 1.29E-02 | 1.12E-02 | 9.04E-03 |
| 8.0                                      | 2.90E-02    | 2.70E-02 | 2.45E-02 | 2.22E-02 | 1.94E-02 | 1.70E-02 | 1.51E-02 | 1.29E-02 | 1.11E-02 | 8.57E-03 |
| 8.5                                      | 3.02E-02    | 2.82E-02 | 2.51E-02 | 2.25E-02 | 1.92E-02 | 1.69E-02 | 1.47E-02 | 1.25E-02 | 1.07E-02 | 8.24E-03 |
| 9.0                                      | 3.15E-02    | 2.87E-02 | 2.58E-02 | 2.26E-02 | 1.93E-02 | 1.67E-02 | 1.44E-02 | 1.20E-02 | 1.04E-02 | 8.04E-03 |
| 9.5                                      | 3.25E-02    | 2.97E-02 | 2.58E-02 | 2.25E-02 | 1.90E-02 | 1.64E-02 | 1.42E-02 | 1.17E-02 | 9.90E-03 | 7.70E-03 |
| 10.0                                     | 3.35E-02    | 3.02E-02 | 2.63E-02 | 2.27E-02 | 1.89E-02 | 1.59E-02 | 1.38E-02 | 1.14E-02 | 9.55E-03 | 7.54E-03 |

  

| <b>Lumbar Vertebrae</b> |             |          |          |          |          |          |          |          |          |          |
|-------------------------|-------------|----------|----------|----------|----------|----------|----------|----------|----------|----------|
| Energy<br>(MeV)         | Cellularity |          |          |          |          |          |          |          |          |          |
|                         | 100%        | 90%      | 80%      | 70%      | 60%      | 50%      | 40%      | 30%      | 20%      | 10%      |
| 3.0                     | 9.11E-03    | 9.10E-03 | 8.85E-03 | 8.70E-03 | 8.47E-03 | 8.32E-03 | 8.13E-03 | 7.85E-03 | 7.53E-03 | 6.94E-03 |
| 3.5                     | 1.10E-02    | 1.07E-02 | 1.05E-02 | 1.03E-02 | 9.95E-03 | 9.75E-03 | 9.25E-03 | 8.91E-03 | 8.35E-03 | 7.73E-03 |
| 4.0                     | 1.23E-02    | 1.21E-02 | 1.18E-02 | 1.14E-02 | 1.11E-02 | 1.05E-02 | 1.01E-02 | 9.74E-03 | 9.07E-03 | 8.18E-03 |
| 4.5                     | 1.37E-02    | 1.34E-02 | 1.31E-02 | 1.25E-02 | 1.20E-02 | 1.14E-02 | 1.06E-02 | 9.93E-03 | 9.42E-03 | 8.26E-03 |
| 5.0                     | 1.47E-02    | 1.43E-02 | 1.39E-02 | 1.32E-02 | 1.25E-02 | 1.18E-02 | 1.10E-02 | 1.02E-02 | 9.31E-03 | 8.00E-03 |
| 5.5                     | 1.59E-02    | 1.51E-02 | 1.46E-02 | 1.39E-02 | 1.28E-02 | 1.20E-02 | 1.13E-02 | 9.98E-03 | 9.12E-03 | 7.75E-03 |
| 6.0                     | 1.68E-02    | 1.63E-02 | 1.53E-02 | 1.44E-02 | 1.32E-02 | 1.22E-02 | 1.12E-02 | 1.01E-02 | 8.95E-03 | 7.47E-03 |
| 6.5                     | 1.80E-02    | 1.72E-02 | 1.60E-02 | 1.48E-02 | 1.37E-02 | 1.23E-02 | 1.13E-02 | 9.94E-03 | 8.66E-03 | 7.12E-03 |
| 7.0                     | 1.89E-02    | 1.79E-02 | 1.65E-02 | 1.52E-02 | 1.37E-02 | 1.23E-02 | 1.11E-02 | 9.66E-03 | 8.49E-03 | 6.75E-03 |
| 7.5                     | 2.00E-02    | 1.88E-02 | 1.71E-02 | 1.56E-02 | 1.38E-02 | 1.23E-02 | 1.10E-02 | 9.44E-03 | 8.19E-03 | 6.52E-03 |
| 8.0                     | 2.07E-02    | 1.93E-02 | 1.76E-02 | 1.59E-02 | 1.39E-02 | 1.23E-02 | 1.08E-02 | 9.24E-03 | 7.85E-03 | 6.17E-03 |
| 8.5                     | 2.16E-02    | 2.02E-02 | 1.80E-02 | 1.61E-02 | 1.39E-02 | 1.21E-02 | 1.05E-02 | 8.92E-03 | 7.61E-03 | 5.92E-03 |
| 9.0                     | 2.26E-02    | 2.09E-02 | 1.84E-02 | 1.62E-02 | 1.39E-02 | 1.20E-02 | 1.04E-02 | 8.69E-03 | 7.37E-03 | 5.75E-03 |
| 9.5                     | 2.34E-02    | 2.10E-02 | 1.86E-02 | 1.63E-02 | 1.37E-02 | 1.18E-02 | 1.01E-02 | 8.43E-03 | 7.09E-03 | 5.52E-03 |
| 10.0                    | 2.41E-02    | 2.16E-02 | 1.88E-02 | 1.62E-02 | 1.35E-02 | 1.15E-02 | 9.82E-03 | 8.17E-03 | 6.85E-03 | 5.40E-03 |

  

| <b>Parietal Bone</b> |             |          |          |          |          |          |          |          |          |          |
|----------------------|-------------|----------|----------|----------|----------|----------|----------|----------|----------|----------|
| Energy<br>(MeV)      | Cellularity |          |          |          |          |          |          |          |          |          |
|                      | 100%        | 90%      | 80%      | 70%      | 60%      | 50%      | 40%      | 30%      | 20%      | 10%      |
| 3.0                  | 3.72E-02    | 3.67E-02 | 3.61E-02 | 3.53E-02 | 3.50E-02 | 3.41E-02 | 3.29E-02 | 3.17E-02 | 3.04E-02 | 2.89E-02 |
| 3.5                  | 4.30E-02    | 4.24E-02 | 4.15E-02 | 4.06E-02 | 3.96E-02 | 3.81E-02 | 3.67E-02 | 3.52E-02 | 3.40E-02 | 3.11E-02 |
| 4.0                  | 4.74E-02    | 4.65E-02 | 4.57E-02 | 4.42E-02 | 4.26E-02 | 4.10E-02 | 3.92E-02 | 3.72E-02 | 3.51E-02 | 3.21E-02 |
| 4.5                  | 5.10E-02    | 4.99E-02 | 4.83E-02 | 4.72E-02 | 4.44E-02 | 4.23E-02 | 4.04E-02 | 3.80E-02 | 3.56E-02 | 3.17E-02 |
| 5.0                  | 5.33E-02    | 5.20E-02 | 5.00E-02 | 4.80E-02 | 4.55E-02 | 4.26E-02 | 4.06E-02 | 3.75E-02 | 3.46E-02 | 3.04E-02 |
| 5.5                  | 5.53E-02    | 5.36E-02 | 5.12E-02 | 4.85E-02 | 4.56E-02 | 4.25E-02 | 3.99E-02 | 3.63E-02 | 3.29E-02 | 2.84E-02 |
| 6.0                  | 5.77E-02    | 5.51E-02 | 5.22E-02 | 4.92E-02 | 4.55E-02 | 4.22E-02 | 3.89E-02 | 3.50E-02 | 3.16E-02 | 2.68E-02 |
| 6.5                  | 5.99E-02    | 5.73E-02 | 5.36E-02 | 5.04E-02 | 4.60E-02 | 4.20E-02 | 3.85E-02 | 3.40E-02 | 3.01E-02 | 2.53E-02 |
| 7.0                  | 6.27E-02    | 5.97E-02 | 5.51E-02 | 5.09E-02 | 4.60E-02 | 4.16E-02 | 3.75E-02 | 3.30E-02 | 2.90E-02 | 2.37E-02 |
| 7.5                  | 6.51E-02    | 6.13E-02 | 5.63E-02 | 5.16E-02 | 4.58E-02 | 4.11E-02 | 3.67E-02 | 3.20E-02 | 2.75E-02 | 2.22E-02 |
| 8.0                  | 6.74E-02    | 6.30E-02 | 5.73E-02 | 5.19E-02 | 4.55E-02 | 4.03E-02 | 3.59E-02 | 3.05E-02 | 2.63E-02 | 2.10E-02 |
| 8.5                  | 6.93E-02    | 6.45E-02 | 5.82E-02 | 5.20E-02 | 4.49E-02 | 3.92E-02 | 3.47E-02 | 2.92E-02 | 2.50E-02 | 1.97E-02 |
| 9.0                  | 7.11E-02    | 6.52E-02 | 5.84E-02 | 5.19E-02 | 4.43E-02 | 3.82E-02 | 3.35E-02 | 2.82E-02 | 2.36E-02 | 1.85E-02 |
| 9.5                  | 7.28E-02    | 6.61E-02 | 5.82E-02 | 5.13E-02 | 4.34E-02 | 3.71E-02 | 3.22E-02 | 2.67E-02 | 2.24E-02 | 1.75E-02 |
| 10.0                 | 7.39E-02    | 6.67E-02 | 5.82E-02 | 5.07E-02 | 4.21E-02 | 3.56E-02 | 3.08E-02 | 2.53E-02 | 2.14E-02 | 1.66E-02 |

TABLE 11B (Continued)

| Energy<br>(MeV) | $\phi(\text{TBE} \leftarrow \text{TAM})$ |          |          |          |          |          |          |          |          |          |
|-----------------|------------------------------------------|----------|----------|----------|----------|----------|----------|----------|----------|----------|
|                 | Ribs                                     |          |          |          |          |          |          |          |          |          |
|                 | Cellularity                              |          |          |          |          |          |          |          |          |          |
|                 | 100%                                     | 90%      | 80%      | 70%      | 60%      | 50%      | 40%      | 30%      | 20%      | 10%      |
| 3.0             | 6.49E-03                                 | 6.52E-03 | 6.37E-03 | 6.27E-03 | 6.27E-03 | 6.01E-03 | 5.81E-03 | 5.58E-03 | 5.28E-03 | 4.97E-03 |
| 3.5             | 7.76E-03                                 | 7.67E-03 | 7.43E-03 | 7.30E-03 | 7.23E-03 | 6.85E-03 | 6.65E-03 | 6.24E-03 | 6.04E-03 | 5.50E-03 |
| 4.0             | 8.83E-03                                 | 8.68E-03 | 8.57E-03 | 8.28E-03 | 8.01E-03 | 7.58E-03 | 7.29E-03 | 6.99E-03 | 6.52E-03 | 5.87E-03 |
| 4.5             | 9.79E-03                                 | 9.53E-03 | 9.17E-03 | 8.94E-03 | 8.56E-03 | 8.09E-03 | 7.73E-03 | 7.15E-03 | 6.71E-03 | 5.88E-03 |
| 5.0             | 1.07E-02                                 | 1.04E-02 | 1.00E-02 | 9.46E-03 | 8.78E-03 | 8.31E-03 | 7.92E-03 | 7.21E-03 | 6.62E-03 | 5.82E-03 |
| 5.5             | 1.12E-02                                 | 1.10E-02 | 1.04E-02 | 9.89E-03 | 9.28E-03 | 8.48E-03 | 7.94E-03 | 7.21E-03 | 6.57E-03 | 5.65E-03 |
| 6.0             | 1.20E-02                                 | 1.16E-02 | 1.09E-02 | 1.03E-02 | 9.49E-03 | 8.76E-03 | 8.13E-03 | 7.19E-03 | 6.44E-03 | 5.40E-03 |
| 6.5             | 1.27E-02                                 | 1.24E-02 | 1.16E-02 | 1.07E-02 | 9.63E-03 | 8.86E-03 | 8.02E-03 | 7.16E-03 | 6.26E-03 | 5.03E-03 |
| 7.0             | 1.36E-02                                 | 1.28E-02 | 1.18E-02 | 1.10E-02 | 9.85E-03 | 8.81E-03 | 7.97E-03 | 6.97E-03 | 6.09E-03 | 4.91E-03 |
| 7.5             | 1.43E-02                                 | 1.35E-02 | 1.23E-02 | 1.11E-02 | 9.81E-03 | 8.91E-03 | 7.86E-03 | 6.79E-03 | 5.96E-03 | 4.72E-03 |
| 8.0             | 1.48E-02                                 | 1.39E-02 | 1.27E-02 | 1.15E-02 | 9.92E-03 | 8.96E-03 | 7.73E-03 | 6.78E-03 | 5.81E-03 | 4.64E-03 |
| 8.5             | 1.56E-02                                 | 1.44E-02 | 1.30E-02 | 1.16E-02 | 1.00E-02 | 8.95E-03 | 7.68E-03 | 6.41E-03 | 5.60E-03 | 4.35E-03 |
| 9.0             | 1.61E-02                                 | 1.48E-02 | 1.33E-02 | 1.18E-02 | 1.01E-02 | 8.58E-03 | 7.65E-03 | 6.37E-03 | 5.31E-03 | 4.24E-03 |
| 9.5             | 1.67E-02                                 | 1.55E-02 | 1.36E-02 | 1.20E-02 | 1.01E-02 | 8.71E-03 | 7.57E-03 | 6.33E-03 | 5.27E-03 | 4.28E-03 |
| 10.0            | 1.75E-02                                 | 1.57E-02 | 1.38E-02 | 1.19E-02 | 1.02E-02 | 8.54E-03 | 7.43E-03 | 6.21E-03 | 5.29E-03 | 4.23E-03 |

**TABLE 12B**

Absorbed Fractions to TBV from  $\alpha$ -Emissions Within TAM of Leeds 44-Year Male  
Within Various Skeletal Sites and as Function of Marrow Cellularity

| $\phi(TBV \leftarrow TAM)$ |             |          |          |          |          |          |          |          |          |          |
|----------------------------|-------------|----------|----------|----------|----------|----------|----------|----------|----------|----------|
| Cervical Vertebrae         |             |          |          |          |          |          |          |          |          |          |
| Energy (MeV)               | Cellularity |          |          |          |          |          |          |          |          |          |
|                            | 100%        | 90%      | 80%      | 70%      | 60%      | 50%      | 40%      | 30%      | 20%      | 10%      |
| 3.0                        | 5.89E-04    | 5.99E-04 | 5.83E-04 | 6.09E-04 | 5.86E-04 | 5.93E-04 | 6.02E-04 | 5.79E-04 | 5.72E-04 | 5.57E-04 |
| 3.5                        | 1.55E-03    | 1.52E-03 | 1.53E-03 | 1.55E-03 | 1.52E-03 | 1.47E-03 | 1.46E-03 | 1.47E-03 | 1.42E-03 | 1.34E-03 |
| 4.0                        | 3.05E-03    | 3.02E-03 | 3.04E-03 | 3.06E-03 | 2.97E-03 | 2.89E-03 | 2.87E-03 | 2.77E-03 | 2.78E-03 | 2.65E-03 |
| 4.5                        | 5.08E-03    | 5.08E-03 | 5.04E-03 | 4.90E-03 | 4.87E-03 | 4.84E-03 | 4.62E-03 | 4.61E-03 | 4.41E-03 | 4.12E-03 |
| 5.0                        | 7.65E-03    | 7.65E-03 | 7.54E-03 | 7.39E-03 | 7.25E-03 | 7.11E-03 | 6.87E-03 | 6.73E-03 | 6.47E-03 | 5.91E-03 |
| 5.5                        | 1.06E-02    | 1.04E-02 | 1.05E-02 | 1.02E-02 | 1.00E-02 | 9.67E-03 | 9.43E-03 | 8.91E-03 | 8.56E-03 | 7.91E-03 |
| 6.0                        | 1.37E-02    | 1.36E-02 | 1.34E-02 | 1.31E-02 | 1.27E-02 | 1.25E-02 | 1.20E-02 | 1.14E-02 | 1.08E-02 | 1.00E-02 |
| 6.5                        | 1.71E-02    | 1.69E-02 | 1.67E-02 | 1.62E-02 | 1.61E-02 | 1.59E-02 | 1.52E-02 | 1.46E-02 | 1.42E-02 | 1.32E-02 |
| 7.0                        | 2.07E-02    | 2.07E-02 | 2.04E-02 | 2.02E-02 | 2.03E-02 | 1.96E-02 | 1.98E-02 | 1.91E-02 | 1.89E-02 | 1.84E-02 |
| 7.5                        | 2.45E-02    | 2.44E-02 | 2.44E-02 | 2.42E-02 | 2.45E-02 | 2.42E-02 | 2.44E-02 | 2.44E-02 | 2.42E-02 | 2.41E-02 |
| 8.0                        | 2.90E-02    | 2.85E-02 | 2.89E-02 | 2.88E-02 | 2.90E-02 | 2.92E-02 | 2.93E-02 | 2.93E-02 | 2.96E-02 | 3.01E-02 |
| 8.5                        | 3.28E-02    | 3.31E-02 | 3.31E-02 | 3.33E-02 | 3.36E-02 | 3.40E-02 | 3.44E-02 | 3.47E-02 | 3.53E-02 | 3.56E-02 |
| 9.0                        | 3.77E-02    | 3.79E-02 | 3.83E-02 | 3.81E-02 | 3.86E-02 | 3.94E-02 | 3.98E-02 | 4.04E-02 | 4.06E-02 | 4.14E-02 |
| 9.5                        | 4.25E-02    | 4.28E-02 | 4.25E-02 | 4.29E-02 | 4.40E-02 | 4.43E-02 | 4.47E-02 | 4.57E-02 | 4.64E-02 | 4.68E-02 |
| 10.0                       | 4.76E-02    | 4.81E-02 | 4.79E-02 | 4.81E-02 | 4.90E-02 | 5.00E-02 | 5.09E-02 | 5.18E-02 | 5.24E-02 | 5.33E-02 |
| Femur Head                 |             |          |          |          |          |          |          |          |          |          |
| Energy (MeV)               | Cellularity |          |          |          |          |          |          |          |          |          |
|                            | 100%        | 90%      | 80%      | 70%      | 60%      | 50%      | 40%      | 30%      | 20%      | 10%      |
| 3.0                        | 3.86E-04    | 4.21E-04 | 4.20E-04 | 3.99E-04 | 3.93E-04 | 4.00E-04 | 4.03E-04 | 3.90E-04 | 3.84E-04 | 3.67E-04 |
| 3.5                        | 1.06E-03    | 1.05E-03 | 9.93E-04 | 1.04E-03 | 1.03E-03 | 1.02E-03 | 1.03E-03 | 9.65E-04 | 9.63E-04 | 9.58E-04 |
| 4.0                        | 2.08E-03    | 2.04E-03 | 2.03E-03 | 2.04E-03 | 2.02E-03 | 1.97E-03 | 1.96E-03 | 1.89E-03 | 1.86E-03 | 1.79E-03 |
| 4.5                        | 3.50E-03    | 3.48E-03 | 3.46E-03 | 3.39E-03 | 3.45E-03 | 3.37E-03 | 3.21E-03 | 3.14E-03 | 3.06E-03 | 2.80E-03 |
| 5.0                        | 5.25E-03    | 5.23E-03 | 5.24E-03 | 5.11E-03 | 5.04E-03 | 4.94E-03 | 4.82E-03 | 4.53E-03 | 4.44E-03 | 4.20E-03 |
| 5.5                        | 7.34E-03    | 7.35E-03 | 7.12E-03 | 7.01E-03 | 6.95E-03 | 6.82E-03 | 6.57E-03 | 6.35E-03 | 6.05E-03 | 5.46E-03 |
| 6.0                        | 9.73E-03    | 9.51E-03 | 9.40E-03 | 9.33E-03 | 9.14E-03 | 8.79E-03 | 8.42E-03 | 8.09E-03 | 7.67E-03 | 6.95E-03 |
| 6.5                        | 1.22E-02    | 1.22E-02 | 1.20E-02 | 1.19E-02 | 1.14E-02 | 1.11E-02 | 1.11E-02 | 1.05E-02 | 1.02E-02 | 9.54E-03 |
| 7.0                        | 1.49E-02    | 1.49E-02 | 1.49E-02 | 1.46E-02 | 1.47E-02 | 1.44E-02 | 1.42E-02 | 1.39E-02 | 1.39E-02 | 1.34E-02 |
| 7.5                        | 1.80E-02    | 1.79E-02 | 1.80E-02 | 1.83E-02 | 1.80E-02 | 1.78E-02 | 1.80E-02 | 1.80E-02 | 1.79E-02 | 1.81E-02 |
| 8.0                        | 2.16E-02    | 2.12E-02 | 2.15E-02 | 2.14E-02 | 2.16E-02 | 2.18E-02 | 2.17E-02 | 2.20E-02 | 2.23E-02 | 2.24E-02 |
| 8.5                        | 2.50E-02    | 2.48E-02 | 2.49E-02 | 2.49E-02 | 2.53E-02 | 2.55E-02 | 2.59E-02 | 2.62E-02 | 2.66E-02 | 2.70E-02 |
| 9.0                        | 2.86E-02    | 2.85E-02 | 2.89E-02 | 2.89E-02 | 2.94E-02 | 2.94E-02 | 3.03E-02 | 3.06E-02 | 3.12E-02 | 3.13E-02 |
| 9.5                        | 3.22E-02    | 3.24E-02 | 3.25E-02 | 3.30E-02 | 3.37E-02 | 3.42E-02 | 3.46E-02 | 3.50E-02 | 3.55E-02 | 3.60E-02 |
| 10.0                       | 3.63E-02    | 3.64E-02 | 3.65E-02 | 3.72E-02 | 3.74E-02 | 3.83E-02 | 3.93E-02 | 3.98E-02 | 4.04E-02 | 4.12E-02 |
| Femur Neck                 |             |          |          |          |          |          |          |          |          |          |
| Energy (MeV)               | Cellularity |          |          |          |          |          |          |          |          |          |
|                            | 100%        | 90%      | 80%      | 70%      | 60%      | 50%      | 40%      | 30%      | 20%      | 10%      |
| 3.0                        | 2.88E-04    | 2.60E-04 | 2.57E-04 | 2.72E-04 | 2.86E-04 | 2.77E-04 | 2.76E-04 | 2.75E-04 | 2.80E-04 | 2.66E-04 |
| 3.5                        | 6.91E-04    | 7.22E-04 | 7.26E-04 | 7.12E-04 | 6.89E-04 | 7.49E-04 | 7.23E-04 | 6.95E-04 | 6.75E-04 | 6.76E-04 |
| 4.0                        | 1.44E-03    | 1.46E-03 | 1.49E-03 | 1.44E-03 | 1.44E-03 | 1.37E-03 | 1.38E-03 | 1.33E-03 | 1.30E-03 | 1.25E-03 |
| 4.5                        | 2.49E-03    | 2.52E-03 | 2.43E-03 | 2.37E-03 | 2.36E-03 | 2.34E-03 | 2.31E-03 | 2.26E-03 | 2.17E-03 | 2.04E-03 |
| 5.0                        | 3.68E-03    | 3.80E-03 | 3.61E-03 | 3.60E-03 | 3.62E-03 | 3.50E-03 | 3.43E-03 | 3.23E-03 | 3.13E-03 | 2.90E-03 |
| 5.5                        | 5.17E-03    | 5.18E-03 | 5.08E-03 | 5.03E-03 | 4.90E-03 | 4.77E-03 | 4.65E-03 | 4.40E-03 | 4.12E-03 | 3.90E-03 |
| 6.0                        | 6.80E-03    | 6.86E-03 | 6.75E-03 | 6.55E-03 | 6.34E-03 | 6.25E-03 | 6.02E-03 | 5.74E-03 | 5.42E-03 | 4.84E-03 |
| 6.5                        | 8.57E-03    | 8.48E-03 | 8.36E-03 | 8.28E-03 | 8.18E-03 | 7.84E-03 | 7.71E-03 | 7.28E-03 | 7.14E-03 | 6.62E-03 |
| 7.0                        | 1.03E-02    | 1.05E-02 | 1.05E-02 | 1.03E-02 | 1.02E-02 | 1.00E-02 | 9.85E-03 | 9.75E-03 | 9.62E-03 | 9.46E-03 |
| 7.5                        | 1.25E-02    | 1.25E-02 | 1.27E-02 | 1.24E-02 | 1.24E-02 | 1.23E-02 | 1.24E-02 | 1.24E-02 | 1.26E-02 | 1.25E-02 |
| 8.0                        | 1.47E-02    | 1.48E-02 | 1.47E-02 | 1.49E-02 | 1.49E-02 | 1.51E-02 | 1.52E-02 | 1.52E-02 | 1.53E-02 | 1.55E-02 |
| 8.5                        | 1.71E-02    | 1.71E-02 | 1.70E-02 | 1.71E-02 | 1.76E-02 | 1.78E-02 | 1.78E-02 | 1.82E-02 | 1.83E-02 | 1.84E-02 |
| 9.0                        | 1.94E-02    | 1.98E-02 | 1.95E-02 | 1.96E-02 | 2.02E-02 | 2.04E-02 | 2.08E-02 | 2.09E-02 | 2.10E-02 | 2.16E-02 |
| 9.5                        | 2.21E-02    | 2.22E-02 | 2.23E-02 | 2.26E-02 | 2.27E-02 | 2.34E-02 | 2.36E-02 | 2.40E-02 | 2.44E-02 | 2.43E-02 |
| 10.0                       | 2.50E-02    | 2.49E-02 | 2.48E-02 | 2.53E-02 | 2.54E-02 | 2.62E-02 | 2.66E-02 | 2.69E-02 | 2.73E-02 | 2.78E-02 |

**TABLE 12B (Continued)**

| $\phi(\text{TBV} \leftarrow \text{TAM})$ |             |          |          |          |          |          |          |          |          |          |
|------------------------------------------|-------------|----------|----------|----------|----------|----------|----------|----------|----------|----------|
| <b>Iliac Crest</b>                       |             |          |          |          |          |          |          |          |          |          |
| Energy<br>(MeV)                          | Cellularity |          |          |          |          |          |          |          |          |          |
|                                          | 100%        | 90%      | 80%      | 70%      | 60%      | 50%      | 40%      | 30%      | 20%      | 10%      |
| 3.0                                      | 5.65E-04    | 5.60E-04 | 5.59E-04 | 5.75E-04 | 5.74E-04 | 5.80E-04 | 5.37E-04 | 5.56E-04 | 5.39E-04 | 5.39E-04 |
| 3.5                                      | 1.45E-03    | 1.45E-03 | 1.40E-03 | 1.43E-03 | 1.43E-03 | 1.37E-03 | 1.38E-03 | 1.36E-03 | 1.31E-03 | 1.29E-03 |
| 4.0                                      | 2.88E-03    | 2.83E-03 | 2.81E-03 | 2.76E-03 | 2.80E-03 | 2.73E-03 | 2.70E-03 | 2.58E-03 | 2.54E-03 | 2.41E-03 |
| 4.5                                      | 4.79E-03    | 4.80E-03 | 4.59E-03 | 4.70E-03 | 4.66E-03 | 4.45E-03 | 4.44E-03 | 4.29E-03 | 4.20E-03 | 3.85E-03 |
| 5.0                                      | 7.08E-03    | 7.04E-03 | 7.12E-03 | 6.90E-03 | 6.68E-03 | 6.55E-03 | 6.44E-03 | 6.23E-03 | 5.88E-03 | 5.62E-03 |
| 5.5                                      | 9.88E-03    | 9.89E-03 | 9.67E-03 | 9.56E-03 | 9.34E-03 | 9.04E-03 | 8.69E-03 | 8.39E-03 | 7.90E-03 | 7.52E-03 |
| 6.0                                      | 1.29E-02    | 1.29E-02 | 1.28E-02 | 1.25E-02 | 1.21E-02 | 1.17E-02 | 1.12E-02 | 1.07E-02 | 1.02E-02 | 9.40E-03 |
| 6.5                                      | 1.65E-02    | 1.60E-02 | 1.60E-02 | 1.58E-02 | 1.55E-02 | 1.49E-02 | 1.46E-02 | 1.41E-02 | 1.35E-02 | 1.25E-02 |
| 7.0                                      | 2.00E-02    | 1.97E-02 | 1.98E-02 | 1.94E-02 | 1.95E-02 | 1.90E-02 | 1.89E-02 | 1.85E-02 | 1.82E-02 | 1.77E-02 |
| 7.5                                      | 2.38E-02    | 2.37E-02 | 2.36E-02 | 2.37E-02 | 2.37E-02 | 2.35E-02 | 2.35E-02 | 2.36E-02 | 2.37E-02 | 2.36E-02 |
| 8.0                                      | 2.79E-02    | 2.78E-02 | 2.82E-02 | 2.79E-02 | 2.83E-02 | 2.85E-02 | 2.88E-02 | 2.90E-02 | 2.92E-02 | 2.95E-02 |
| 8.5                                      | 3.26E-02    | 3.26E-02 | 3.27E-02 | 3.28E-02 | 3.32E-02 | 3.33E-02 | 3.38E-02 | 3.43E-02 | 3.47E-02 | 3.55E-02 |
| 9.0                                      | 3.73E-02    | 3.72E-02 | 3.73E-02 | 3.75E-02 | 3.84E-02 | 3.88E-02 | 3.91E-02 | 3.97E-02 | 4.04E-02 | 4.12E-02 |
| 9.5                                      | 4.20E-02    | 4.21E-02 | 4.20E-02 | 4.25E-02 | 4.31E-02 | 4.42E-02 | 4.46E-02 | 4.56E-02 | 4.63E-02 | 4.67E-02 |
| 10.0                                     | 4.73E-02    | 4.71E-02 | 4.72E-02 | 4.77E-02 | 4.87E-02 | 4.96E-02 | 5.02E-02 | 5.16E-02 | 5.24E-02 | 5.29E-02 |
| <b>Lumbar Vertebrae</b>                  |             |          |          |          |          |          |          |          |          |          |
| Energy<br>(MeV)                          | Cellularity |          |          |          |          |          |          |          |          |          |
|                                          | 100%        | 90%      | 80%      | 70%      | 60%      | 50%      | 40%      | 30%      | 20%      | 10%      |
| 3.0                                      | 4.16E-04    | 4.30E-04 | 4.15E-04 | 4.29E-04 | 4.12E-04 | 4.08E-04 | 4.34E-04 | 3.95E-04 | 4.11E-04 | 3.87E-04 |
| 3.5                                      | 1.06E-03    | 1.06E-03 | 1.05E-03 | 1.06E-03 | 1.05E-03 | 1.06E-03 | 1.03E-03 | 1.01E-03 | 9.79E-04 | 9.47E-04 |
| 4.0                                      | 2.10E-03    | 2.06E-03 | 2.11E-03 | 2.04E-03 | 2.07E-03 | 2.00E-03 | 1.97E-03 | 1.93E-03 | 1.91E-03 | 1.78E-03 |
| 4.5                                      | 3.52E-03    | 3.51E-03 | 3.55E-03 | 3.46E-03 | 3.46E-03 | 3.32E-03 | 3.34E-03 | 3.14E-03 | 3.06E-03 | 2.92E-03 |
| 5.0                                      | 5.32E-03    | 5.29E-03 | 5.27E-03 | 5.19E-03 | 4.98E-03 | 4.96E-03 | 4.74E-03 | 4.67E-03 | 4.45E-03 | 4.12E-03 |
| 5.5                                      | 7.55E-03    | 7.19E-03 | 7.29E-03 | 7.12E-03 | 7.01E-03 | 6.73E-03 | 6.70E-03 | 6.25E-03 | 6.06E-03 | 5.54E-03 |
| 6.0                                      | 9.58E-03    | 9.54E-03 | 9.43E-03 | 9.26E-03 | 9.07E-03 | 8.81E-03 | 8.40E-03 | 8.08E-03 | 7.63E-03 | 6.98E-03 |
| 6.5                                      | 1.21E-02    | 1.19E-02 | 1.18E-02 | 1.18E-02 | 1.15E-02 | 1.12E-02 | 1.08E-02 | 1.03E-02 | 9.96E-03 | 9.42E-03 |
| 7.0                                      | 1.46E-02    | 1.47E-02 | 1.44E-02 | 1.44E-02 | 1.42E-02 | 1.40E-02 | 1.38E-02 | 1.38E-02 | 1.36E-02 | 1.31E-02 |
| 7.5                                      | 1.76E-02    | 1.76E-02 | 1.75E-02 | 1.73E-02 | 1.75E-02 | 1.72E-02 | 1.74E-02 | 1.74E-02 | 1.73E-02 | 1.74E-02 |
| 8.0                                      | 2.04E-02    | 2.05E-02 | 2.04E-02 | 2.06E-02 | 2.09E-02 | 2.10E-02 | 2.09E-02 | 2.12E-02 | 2.14E-02 | 2.15E-02 |
| 8.5                                      | 2.38E-02    | 2.40E-02 | 2.38E-02 | 2.42E-02 | 2.44E-02 | 2.46E-02 | 2.48E-02 | 2.51E-02 | 2.55E-02 | 2.56E-02 |
| 9.0                                      | 2.72E-02    | 2.72E-02 | 2.73E-02 | 2.75E-02 | 2.77E-02 | 2.84E-02 | 2.87E-02 | 2.91E-02 | 2.93E-02 | 2.98E-02 |
| 9.5                                      | 3.06E-02    | 3.05E-02 | 3.09E-02 | 3.09E-02 | 3.16E-02 | 3.22E-02 | 3.24E-02 | 3.31E-02 | 3.35E-02 | 3.40E-02 |
| 10.0                                     | 3.45E-02    | 3.43E-02 | 3.44E-02 | 3.46E-02 | 3.52E-02 | 3.61E-02 | 3.67E-02 | 3.73E-02 | 3.82E-02 | 3.87E-02 |
| <b>Parietal Bone</b>                     |             |          |          |          |          |          |          |          |          |          |
| Energy<br>(MeV)                          | Cellularity |          |          |          |          |          |          |          |          |          |
|                                          | 100%        | 90%      | 80%      | 70%      | 60%      | 50%      | 40%      | 30%      | 20%      | 10%      |
| 3.0                                      | 1.90E-03    | 1.96E-03 | 1.93E-03 | 1.96E-03 | 1.87E-03 | 1.90E-03 | 1.87E-03 | 1.77E-03 | 1.80E-03 | 1.73E-03 |
| 3.5                                      | 4.78E-03    | 4.71E-03 | 4.68E-03 | 4.68E-03 | 4.58E-03 | 4.59E-03 | 4.62E-03 | 4.44E-03 | 4.38E-03 | 4.16E-03 |
| 4.0                                      | 9.22E-03    | 9.19E-03 | 9.10E-03 | 9.12E-03 | 9.06E-03 | 8.69E-03 | 8.59E-03 | 8.51E-03 | 8.20E-03 | 7.87E-03 |
| 4.5                                      | 1.54E-02    | 1.53E-02 | 1.50E-02 | 1.50E-02 | 1.46E-02 | 1.44E-02 | 1.40E-02 | 1.38E-02 | 1.33E-02 | 1.24E-02 |
| 5.0                                      | 2.27E-02    | 2.25E-02 | 2.24E-02 | 2.20E-02 | 2.19E-02 | 2.11E-02 | 2.04E-02 | 1.99E-02 | 1.91E-02 | 1.78E-02 |
| 5.5                                      | 3.11E-02    | 3.09E-02 | 3.04E-02 | 2.98E-02 | 2.92E-02 | 2.85E-02 | 2.77E-02 | 2.65E-02 | 2.52E-02 | 2.34E-02 |
| 6.0                                      | 3.99E-02    | 3.90E-02 | 3.87E-02 | 3.79E-02 | 3.70E-02 | 3.60E-02 | 3.45E-02 | 3.30E-02 | 3.15E-02 | 2.92E-02 |
| 6.5                                      | 4.83E-02    | 4.79E-02 | 4.71E-02 | 4.68E-02 | 4.54E-02 | 4.45E-02 | 4.30E-02 | 4.14E-02 | 3.98E-02 | 3.76E-02 |
| 7.0                                      | 5.74E-02    | 5.74E-02 | 5.66E-02 | 5.58E-02 | 5.57E-02 | 5.47E-02 | 5.39E-02 | 5.29E-02 | 5.20E-02 | 5.09E-02 |
| 7.5                                      | 6.69E-02    | 6.68E-02 | 6.63E-02 | 6.64E-02 | 6.65E-02 | 6.57E-02 | 6.61E-02 | 6.54E-02 | 6.52E-02 | 6.52E-02 |
| 8.0                                      | 7.71E-02    | 7.69E-02 | 7.72E-02 | 7.70E-02 | 7.78E-02 | 7.79E-02 | 7.81E-02 | 7.86E-02 | 7.84E-02 | 7.94E-02 |
| 8.5                                      | 8.80E-02    | 8.77E-02 | 8.85E-02 | 8.80E-02 | 8.92E-02 | 8.97E-02 | 9.06E-02 | 9.14E-02 | 9.18E-02 | 9.34E-02 |
| 9.0                                      | 9.86E-02    | 9.91E-02 | 9.91E-02 | 9.99E-02 | 1.01E-01 | 1.02E-01 | 1.03E-01 | 1.05E-01 | 1.06E-01 | 1.07E-01 |
| 9.5                                      | 1.10E-01    | 1.10E-01 | 1.10E-01 | 1.12E-01 | 1.13E-01 | 1.14E-01 | 1.16E-01 | 1.18E-01 | 1.19E-01 | 1.20E-01 |
| 10.0                                     | 1.23E-01    | 1.22E-01 | 1.23E-01 | 1.24E-01 | 1.25E-01 | 1.28E-01 | 1.30E-01 | 1.32E-01 | 1.33E-01 | 1.34E-01 |

TABLE 12B (Continued)

| Energy<br>(MeV) | $\phi(\text{TBV} \leftarrow \text{TAM})$ |          |          |          |          |          |          |          |          |          |
|-----------------|------------------------------------------|----------|----------|----------|----------|----------|----------|----------|----------|----------|
|                 | Ribs                                     |          |          |          |          |          |          |          |          |          |
|                 | Cellularity                              |          |          |          |          |          |          |          |          |          |
|                 | 100%                                     | 90%      | 80%      | 70%      | 60%      | 50%      | 40%      | 30%      | 20%      | 10%      |
| 3.0             | 2.98E-04                                 | 2.93E-04 | 2.87E-04 | 2.85E-04 | 2.76E-04 | 2.87E-04 | 2.87E-04 | 2.73E-04 | 2.83E-04 | 2.63E-04 |
| 3.5             | 7.78E-04                                 | 7.60E-04 | 7.35E-04 | 7.37E-04 | 7.39E-04 | 7.37E-04 | 7.27E-04 | 6.99E-04 | 7.19E-04 | 6.76E-04 |
| 4.0             | 1.54E-03                                 | 1.47E-03 | 1.49E-03 | 1.45E-03 | 1.47E-03 | 1.45E-03 | 1.45E-03 | 1.42E-03 | 1.35E-03 | 1.31E-03 |
| 4.5             | 2.53E-03                                 | 2.43E-03 | 2.48E-03 | 2.47E-03 | 2.45E-03 | 2.43E-03 | 2.36E-03 | 2.26E-03 | 2.17E-03 | 2.08E-03 |
| 5.0             | 3.79E-03                                 | 3.76E-03 | 3.68E-03 | 3.64E-03 | 3.60E-03 | 3.56E-03 | 3.46E-03 | 3.34E-03 | 3.21E-03 | 3.02E-03 |
| 5.5             | 5.24E-03                                 | 5.23E-03 | 5.23E-03 | 5.08E-03 | 5.07E-03 | 4.77E-03 | 4.83E-03 | 4.50E-03 | 4.32E-03 | 3.93E-03 |
| 6.0             | 6.98E-03                                 | 6.78E-03 | 6.84E-03 | 6.61E-03 | 6.49E-03 | 6.28E-03 | 6.07E-03 | 5.71E-03 | 5.38E-03 | 5.00E-03 |
| 6.5             | 8.55E-03                                 | 8.58E-03 | 8.25E-03 | 8.33E-03 | 8.20E-03 | 7.96E-03 | 7.81E-03 | 7.47E-03 | 7.08E-03 | 6.57E-03 |
| 7.0             | 1.05E-02                                 | 1.06E-02 | 1.03E-02 | 1.03E-02 | 1.01E-02 | 1.00E-02 | 9.95E-03 | 9.77E-03 | 9.63E-03 | 9.33E-03 |
| 7.5             | 1.24E-02                                 | 1.25E-02 | 1.24E-02 | 1.23E-02 | 1.22E-02 | 1.24E-02 | 1.25E-02 | 1.23E-02 | 1.23E-02 | 1.25E-02 |
| 8.0             | 1.43E-02                                 | 1.46E-02 | 1.46E-02 | 1.46E-02 | 1.48E-02 | 1.47E-02 | 1.48E-02 | 1.51E-02 | 1.53E-02 | 1.53E-02 |
| 8.5             | 1.68E-02                                 | 1.67E-02 | 1.69E-02 | 1.68E-02 | 1.70E-02 | 1.74E-02 | 1.73E-02 | 1.77E-02 | 1.79E-02 | 1.82E-02 |
| 9.0             | 1.90E-02                                 | 1.91E-02 | 1.93E-02 | 1.92E-02 | 1.95E-02 | 1.98E-02 | 2.02E-02 | 2.04E-02 | 2.06E-02 | 2.09E-02 |
| 9.5             | 2.14E-02                                 | 2.18E-02 | 2.17E-02 | 2.18E-02 | 2.21E-02 | 2.26E-02 | 2.27E-02 | 2.34E-02 | 2.33E-02 | 2.39E-02 |
| 10.0            | 2.41E-02                                 | 2.37E-02 | 2.39E-02 | 2.42E-02 | 2.48E-02 | 2.52E-02 | 2.56E-02 | 2.61E-02 | 2.65E-02 | 2.68E-02 |
